1                   **GIT2 is dispensable for normal learning and memory function**  
2                   **due to a predominant brain GIT2 splice variant that evades GIT/PIX complexes**

3  
4                   **Short title: Brain GIT2( $\Delta$ BCE) splice variant**

5  
6   Krisztian Toth <sup>a,1,2</sup>, Amanda C. Martyn <sup>a,1,3</sup>, Natalia Bastrikova <sup>b</sup>, Woojoo Kim <sup>a</sup>, Ramona M.  
7   Rodríguez <sup>c</sup>, Umer Ahmed <sup>a</sup>, Robert Schmalzigaug <sup>a</sup>, Serena M. Dudek <sup>b</sup>, William C. Wetsel <sup>c,d</sup>, and  
8   Richard T. Premont <sup>a,4,\*</sup>

9  
10   <sup>a</sup> *Department of Medicine, Duke University Medical Center, Durham, NC 27710, USA*

11   <sup>b</sup> *Synaptic and Developmental Plasticity Group, Laboratory of Neurobiology, National Institute of*  
12   *Environmental Health Sciences, Research Triangle Park, NC 27709 USA*

13   <sup>c</sup> *Mouse Behavioral and Neuroendocrine Analysis Core Facility, Duke University Medical Center,*  
14   *Durham, NC 27710, USA*

15   <sup>d</sup> *Department of Psychiatry and Behavioral Sciences, Department of Cell Biology, and Department of*  
16   *Neurobiology, Duke University Medical Center, Durham, NC 27710, USA*

17  
18   \* Corresponding author at: Department of Medicine, Case Western Reserve University, Cleveland,  
19   OH 44106 Tel +1-216-368-5730 E-mail address: [richard.premont@case.edu](mailto:richard.premont@case.edu)

20  
21   <sup>1</sup> These investigators contributed equally to these studies.

22   <sup>2</sup> Current address: Campbell University School of Pharmacy, Buies Creek, NC 27506

23 <sup>3</sup> Current address: North Carolina School of Science and Math, Durham, NC 27705

24 <sup>4</sup> Current address: Harrington Discovery Institute, University Hospitals Medical Center, Cleveland

25 OH 44106 and Institute for Transformative Molecular Medicine, Department of Medicine, Case

26 Western Reserve University School of Medicine, Cleveland, OH 44106.

27

28 Author contributions: RS, RTP, conceived and planned project; KT, ACM, NB, WK, UA, RS, RMR, RTP,

29 performed experiments; KT, ACM, RS, RMR, RTP, analyzed data; KT, ACM, RS, RTP, wrote

30 manuscript; WCW, edited manuscript; RTP, obtained funding.

31

32 **Abstract**

33

34 G protein-coupled receptor kinase-interacting protein 2 (GIT2) and GIT1 are highly similar, sharing  
35 the same domain structure and many binding partners. The most important GIT partners are the  
36 p21-activated protein kinase-interacting exchange factor (PIX) proteins, since through homomeric  
37 and heteromeric interactions, GIT and PIX proteins form oligomeric GIT/PIX complexes. Oligomeric  
38 GIT/PIX complexes function both as regulators of small GTP-binding proteins and as scaffolds for  
39 signalling molecules, including p21-activated protein kinases (PAKs). Deficits in learning and  
40 memory have been demonstrated in GIT1 knockout mice, and it has been assumed that GIT2 also  
41 would affect learning and memory. Unexpectedly, we find that GIT2-deficient mice respond  
42 normally in multiple tests of learning and memory, and have normal hippocampal long-term  
43 potentiation. Further, we find no evidence that GIT2 regulates ADHD-like phenotypes. To  
44 investigate why GIT2 and GIT1 differ so markedly in the brain, we identified the major isoform of  
45 GIT2 in the brain as a previously uncharacterized splice variant, GIT2( $\Delta$ BCE). This variant cannot  
46 dimerize or form oligomeric complexes with PIX proteins, and is thus incapable of regulating PAK  
47 in synapses, compared to oligomeric GIT1/PIX complexes. Because localized activation of PAK in  
48 synapses is required for structural plasticity underlying cognitive performance, loss of monomeric  
49 GIT2( $\Delta$ BCE) in the brain does not influence these responses.

50

51 **Introduction**

52

53 The GRK-interacting (GIT) proteins, GIT1 and GIT2, are signalling scaffold proteins (Zhou, Li et al.  
54 2016). The GIT proteins function as direct signal mediators through their ADP-ribosylation factor  
55 (Arf) GTPase-activating protein domain, which inactivates Arf family small GTP-binding proteins  
56 (Premont, Claing et al. 1998, Vitale, Patton et al. 2000). The GIT proteins also serve as subunits  
57 within an oligomeric scaffolding complex, formed together with p21-activated kinase-interacting  
58 guanine nucleotide exchange factor (PIX) proteins (Zhou, Li et al. 2016). GIT protein dimers formed  
59 through a coiled-coil self-association interact with PIX protein coiled-coil trimers (Schlenker and  
60 Rittinger 2009) to form very high-molecular weight oligomeric GIT/PIX complexes (Premont, Perry  
61 et al. 2004, Totaro, Tavano et al. 2012) that may consist of two or more of these presumed  
62 pentameric units. The tight linkage of GIT and PIX proteins is evident in the profound loss of PIX  
63 proteins in the brain of GIT1-deficient mice (Won, Mah et al. 2011) or in immune cells from GIT2-  
64 deficient mice (Hao, He et al. 2015), or of GIT2 in immune cells from  $\alpha$ -PIX-deficient mice (Missy,  
65 Hu et al. 2008).

66

67 The two GIT proteins, GIT1 and GIT2, have been implicated in learning and memory function. This  
68 was based initially on the identification of the GIT/PIX signalling pathway members  $\alpha$ -PIX (Kutsche,  
69 Yntema et al. 2000) and PAK3 (Allen, Gleeson et al. 1998) as human X-linked intellectual disability  
70 genes. Loss of  $\alpha$ -PIX (Ramakers, Wolfer et al. 2012) or loss of both PAK1 and PAK3 (Huang, Zhou et  
71 al. 2011) in mice recapitulates this severe learning and memory phenotype. The direct evidence for  
72 a role for GIT1 in learning and memory is quite strong. Overexpressing GIT1 or interfering with  
73 GIT1 localization in primary hippocampal neurons alters dendritic spine density (Zhang, Webb et  
74 al. 2003). Memory defects have been reported in GIT1-deficient mice in aversive memory through  
75 fear conditioning (Schmalzigaug, Rodriguiz et al. 2009, Fass, Lewis et al. 2018), in associative



76 memory using operant conditioning (Menon, Deane et al. 2010), in working memory through T-  
77 maze spontaneous alternation (Fass, Lewis et al. 2018) and in spatial and contextual memory in the  
78 Morris water maze and novel object recognition tests (Won, Mah et al. 2011, Martyn, Toth et al.  
79 2018). In contrast, nothing has been reported concerning a direct role for GIT2 in learning and  
80 memory processes in neurons or in an animal model, although GIT2 has been presumed to be  
81 important in this function due to its similar biochemical functions compared to GIT1 (Premont,  
82 Claing et al. 2000, Zhou, Li et al. 2016, van Gastel, Boddaert et al. 2018)

83

84 One prominent report has linked a GIT1 gene polymorphism to attention deficit-hyperactivity  
85 disorder (ADHD) in a Japanese cohort, and genetrap mice lacking GIT1 were reported to model two  
86 critical aspects of ADHD: basal hyperactivity, and paradoxical calming by psychostimulants (Won,  
87 Mah et al. 2011). This linkage has been controversial, however. One group found no association of  
88 *GIT1* gene polymorphisms with human ADHD in a Brazilian population (Salatino-Oliveira, Genro et  
89 al. 2012), while another large study found no association in three large patient cohorts (Klein, van  
90 der Voet et al. 2015). Functionally, our group has shown that a distinct line of GIT1-deficient mice  
91 fails to demonstrate either hyperactivity or psychostimulant-induced locomotor suppression  
92 (Schmalzigaug, Rodriguiz et al. 2009, Martyn, Toth et al. 2018). Furthermore, a study using  
93 *Drosophila* also found no evidence for altered locomotor behavior in the absence of the single GIT  
94 gene, *dGIT* (Klein, van der Voet et al. 2015).

95

96 Here we have tested the hypothesis that GIT2-deficient mice might also exhibit an ADHD-like  
97 phenotype as well as learning and memory defects. Instead we show that GIT2-deficient mice are  
98 neither hyperactive nor display ADHD-like behaviors, but they also unexpectedly exhibit  
99 completely normal learning and memory function in several behavioral tests, as well as exhibit  
100 normal hippocampal long-term potentiation. This fundamental distinction between GIT2 and GIT1

101 in regulating learning and memory processes led us to examine GIT2 alternative splicing in the  
102 brain, since GIT2 is known to have extensive tissue-specific alternative splicing (Premont, Claing et  
103 al. 2000). We identify a predominant splice variant of GIT2 expressed in the brain that is lacking  
104 internal sequences that contain the coiled-coil region required for GIT dimerization. We find that  
105 this variant neither dimerizes nor forms tight oligomeric GIT/PIX complexes. The inability of the  
106 major brain form of GIT2 to function as part of oligomeric GIT/PIX scaffold complexes explains why  
107 loss of GIT2 in the brain does not affect synaptic PIX/PAK signalling required for learning and  
108 memory.

109 **Methods**

110

111 **Plasmids**

112 The pBK( $\Delta$ )-human GIT2-long/Flag plasmid has been described previously (Premont, Claing et al.  
113 2000). This plasmid was used as template for site-directed mutagenesis to create GIT2( $\Delta$ BC)/Flag,  
114 GIT2( $\Delta$ E)/Flag and the double-deletion GIT2( $\Delta$ BCE)/Flag using the QuikChange mutagenesis kit  
115 (Stratagene). The  $\Delta$ BC primers were 5'-  
116 ACTGCAAGCAAAACAAACCGGCAGAAGCTTCAAACACTCCAGAGTGAAAATTCG and 5'-  
117 GCAATTTTCACTCTGGAGTGTTTGAAGCTTCTGCCGTTTGTGTTTGCTTGCAGT to delete amino acids  
118 415-464, and the  $\Delta$ E primers were 5'-CCCTTCCCCGCGCACGCATCCAGGCTGGAG and 5'-  
119 CTCCAGCCTGGATGCGTGCGCGCGAAGGG to delete amino acids 465-547, using the amino acid  
120 residue numbering of human GIT2-long.

121

122 **GIT2 variant PCR**

123 To detect the internal alternative splicing of the GIT2 transcript, we prepared total RNA from  
124 dissected wildtype mouse brain regions using Qiazol (Qiagen) and prepared cDNA using the  
125 SuperScript III first-strand synthesis kit (Invitrogen). Primers spanning the A-B-C-D-E splicing  
126 region were 5'-GGTCAACCCTGAGTACTCCTC and 5'-AATCACTCTCCGGGGTGCTGT, and were used to  
127 amplify this region by PCR for 35 cycles. Resulting bands were isolated from an agarose gel and  
128 subjected to direct DNA sequencing using each of the amplification primers.

129

130 **Animals**

131 The gene-trap *Git2* mice have been described previously (Schmalzigaug, Phee et al. 2007,  
132 Schmalzigaug, Rodriguiz et al. 2009), and were maintained on a mixed C57BL/6 x 1290la genetic  
133 background. All behavioral studies reported here used this gene-trap strain. A distinct second *Git2*

134 knockout strain with a NEO insertion in exon 2 (Mazaki, Hashimoto et al. 2006) was obtained from  
135 Dr. Hisatake Sabe at 5 generations backcrossed to C57BL/6, and was further backcrossed to 12  
136 generations C57BL/6J, but was used here only for brain GIT protein immunoprecipitation assays.  
137 Mice were housed 3-5/cage in a temperature- and humidity-controlled barrier facility on a 12h:12h  
138 light:dark cycle (lights on at 0700h). Chow diet and water were provided *ad libitum*. Behavioral  
139 assays used both male and female mice. All procedures were conducted with protocols approved by  
140 the Duke University Institutional Animal Care and Use Committee.

141

## 142 **Behavior**

143 Testing for 24-hour locomotion, amphetamine-induced locomotion and learning and memory  
144 function using the Morris water maze and novel object recognition memory test were as described  
145 recently (Martyn, Toth et al. 2018). **Open field activity.** Motor activity in the open field was  
146 assessed in two separate experiments. In the first study, spontaneous locomotor activity was  
147 analyzed over 24 hours in a 42 x 42 x 30 cm open field (Omnitech Inc., Columbus, OH) illuminated  
148 at 340 lux. Activity was monitored in 30-min segments by 8 photobeams, spaced 2.5 cm apart,  
149 positioned 2.25 cm from the floor, and located around the perimeter of the open field (Martyn, Toth  
150 et al. 2018). Mice were placed into the apparatus at 1300 hr and removed 24 hr later. A second  
151 study evaluated locomotor responses to 0.5, 1, and 2 mg/kg amphetamine (Sigma-Aldrich, St. Louis,  
152 MO). Mice were placed into the open field for 60 min to assess baseline activity. They were  
153 removed, injected (i.p.) with AMPH, and returned immediately to the open field for 90 min.  
154 Locomotor activity was measured in 5-min segments and expressed as distance traveled in cm.

155 **Fear conditioning.** Mice were placed into a MedAssociates fear conditioning apparatus (St. Albans,  
156 VT). After 2 min, a 30 sec 72 dB tone (CS) sounded that was terminated with a 2 sec 0.4 mA  
157 scrambled foot-shock (US); the mice remained in the conditioning apparatus for 30 sec and then  
158 were returned to their home-cage (Schmalzigaug, Rodriguiz et al. 2009, Porton, Rodriguiz et al.

159 2010). Twenty-four hr later the mice were tested in contextual fear by returning the mouse to the  
160 same chamber in which it had been conditioned in the absence of the CS and US for 5 min. The next  
161 day mice were tested for cued fear. They were placed into a novel chamber whose color, texture,  
162 shape, dimensions, and level of illumination were different from that of the conditioning chamber.  
163 After 2 min, the CS was presented for 3 min. All tests were videotaped and behaviors were scored  
164 by a trained observer blinded to the genotype of the mice using Noldus Observer software  
165 (Leesburg, VA). Freezing refers to the lack of all non-respiratory movement by the animal for >1 sec  
166 (Anagnostaras, Josselyn et al. 2000, Porton, Rodriguiz et al. 2010). **Novel object recognition**  
167 **memory.** Mice were trained by presentation of a pair of identical objects for 5 min and these  
168 objects constituted the “familiar” objects in the test. After 20 min mice were tested for short-term  
169 (STM) and were tested for long-term memory (LTM) 24 hr after training. In each case, a single  
170 familiar object was paired with a novel object. All behaviors were filmed and were scored  
171 subsequently with Noldus Ethovision by observers who were blind to the genotypes and sex of the  
172 animals. Preference scores were calculated by subtracting the total time spent with the familiar  
173 object from time spent with the novel object, and dividing this difference by the total amount of  
174 time spent with both objects. Positive scores indicated preferences for the novel object, negative  
175 scores denoted preferences for the familiar object, and scores approaching “zero” signified a  
176 preference for neither object. **Spatial learning and memory in the Morris water maze.** All  
177 training and testing were conducted in a 120 cm diameter pool, maintained at 24°C, and under  
178 ~125 lux illumination. The pool was divided into northeast (NE), northwest (NW), southeast (SE)  
179 and southwest (SW) quadrants. Prior to testing, mice were handled, acclimated to standing in  
180 water, and trained to sit on and swim around the hidden platform. Testing was divided into 2  
181 phases: acquisition (days 1-8) with the hidden platform in the NE quadrant and reversal (days 9-  
182 16) with the hidden platform in the SW quadrant. Mice received 4 trials a day in pairs that were  
183 separated by 60 min. Release points were randomized across trials and days. Every other day, a

184 single probe trial where the platform was removed from the maze was given 1 hr after the 4 test-  
185 trials. The same cohort of mice was used for visible platform testing with 4 trials a day over 5  
186 consecutive days. For this test, mice were released from the point opposite the platform and given  
187 60 sec to swim to the visible platform. The platform location was changed on each trial to a new,  
188 randomized location. All trials ended when the animal reached the platform or after 60 sec had  
189 elapsed. Performance was filmed by high-resolution camera suspended 180 cm above the center of  
190 the pool and scored by blinded observers using Ethovision XT 7 (Noldus). Tracking profiles were  
191 generated and were used to measure swim time and swim velocity.

192

193

#### 194 **Spine density**

195 For determination of spine morphology and density, eleven day-old mice were decapitated  
196 following an overdose with Nembutal. Slice cultures were prepared as described previously  
197 (Simons, Escobedo et al. 2009). Briefly, the whole brain was removed under sterile conditions and  
198 immersed in ice cold MEM (GIBCO Technologies) supplemented with 25 mM Hepes, 10 mM Tris-  
199 base, 10 mM glucose, and 3 mM MgCl<sub>2</sub>. Slices containing hippocampus were then cut at 200 μm on a  
200 vibrating tissue slicer (Leica) and placed into the center of a membrane in a transwell plate  
201 (Costar). Culture media was prepared as a 2:1 mixture of Basal Medium Eagle (Sigma) and Earle's  
202 Balanced Salts Solution (Sigma), respectively, and supplemented with 20 mM NaCl, 5 mM NaHCO<sub>3</sub>,  
203 0.2 mM CaCl<sub>2</sub>, 1.7 mM MgSO<sub>4</sub>, 48 mM glucose, 26.7 mM Hepes, 5% horse serum (GIBCO), 10 ml/liter  
204 penicillin-streptomycin (GIBCO), 1.32 mg/liter insulin (Sigma), and the pH adjusted to 7.2. The  
205 slices were incubated in 5% CO<sub>2</sub> at 34°C and half the media replaced daily. On DIV 6–7, the  
206 organotypic slices were infected with a recombinant Sindbis virus for expression of EGFP. Infected  
207 slices with sufficient EGFP expression were fixed with 4% paraformaldehyde and imaged using an  
208 Axioskop 2FS microscope (Carl Zeiss, Inc., Thornwood, NY) coupled to a Zeiss LSM 510 NLO META

209 system and a Ti:sapphire Chameleon two-photon laser system. Images of dendrites in the CA1  
210 region of the hippocampus were acquired with a two-photon laser tuned to 900 nm (Coherent, Inc.,  
211 Auburn, CA) for high resolution, and an Argon laser at 488nm (for eGFP excitation) for larger views  
212 of the slice. Individual Z-stack images containing 35-40 micron lengths of dendritic segments from  
213 17 WT and 18 KO slices from 5 mice for each genotype were analyzed using the Zeiss software for  
214 spine density and morphology according to the method outlined by (Chapleau, Carlo et al. 2008).  
215 Briefly, a protrusion was considered to be a spine if it extended less than or equal to 3 $\mu$ m from the  
216 parent dendrite. Each spine was counted only once by following its projection course through the  
217 stack of z sections. Spine density was calculated by quantifying the number of spines per dendritic  
218 segment length. For each spine, morphology was determined by measuring the diameter of the  
219 neck of each spine (N), its length (L), and the diameter of each head (H). Spines were classified into  
220 3 types: stubby, mushroom and thin, based on the ratios of L/N and H/N. Stubby spines have L, N,  
221 and H dimensions that are all similar to each other (L~N~H). Mushroom spines have an H/N ratio  
222 greater than one, with H>N. Thin spines have L>N. WT and GIT2-KO spine density were compared  
223 using the Mann-Whitney U (Rank sum test).

224

## 225 **Electrophysiology**

226 Slices of hippocampus were prepared as described (Bastrikova, Gardner et al. 2008). Animals were  
227 deeply anaesthetized with Nembutal and decapitated prior to brain removal. Slices of hippocampus  
228 were cut using a vibrating tissue slicer (Leica) in sucrose-substituted artificial cerebral spinal fluid  
229 (ACSF) in mM: 240 sucrose, 2.0 KCl, 1 MgCl<sub>2</sub>, 2 MgSO<sub>4</sub>, 1 CaCl<sub>2</sub>, 1.25 NaH<sub>2</sub>PO<sub>4</sub>, 26 NaHCO<sub>3</sub>, and 10  
230 glucose, which was bubbled with 95% O<sub>2</sub>/5% CO<sub>2</sub>. Slices were transferred directly to an interface-  
231 type recording chamber where they were allowed to incubate for at least one hour before  
232 recording. Slices were continuously bathed at 34° C with standard ACSF (in mM): 124 NaCl, 2.5 KCl,  
233 2 MgCl<sub>2</sub>, 2 CaCl<sub>2</sub>, 1.25 NaH<sub>2</sub>PO<sub>4</sub>, 26 NaHCO<sub>3</sub>, and 17 D-glucose. Synaptic responses in the CA1 region

234 were evoked with a bipolar stimulating electrode placed in the stratum radiatum of CA1 and  
235 recorded with an ACSF-filled glass pipette, also placed in the stratum radiatum. Long-term  
236 potentiation (LTP) of the field excitatory post-synaptic potential (fEPSP) was induced with three  
237 episodes of theta burst stimulation (TBS; ten 100 Hz bursts of 4 pulses delivered at 5 Hz, 30  
238 seconds apart). Partial depotentiation was induced with 900 pulses delivered over 7.5 minutes at 2  
239 Hz (low-frequency stimulation; LFS). Data are expressed as a percentage of the average baseline  
240 response collected in the fifteen minutes prior to the TBS, and are presented as an mean from 15  
241 slices from 9 mice +/- SEM. Paired-pulse frequency (PPF) was measured by delivering two  
242 electrical pulses in short succession and was expressed as a ratio of the size of the second synaptic  
243 response to the size of the first synaptic response.

244

#### 245 **Cell culture, transfection, immunoprecipitation and western blotting**

246 COS7 cells were maintained at 37°C under 5% CO<sub>2</sub> in DMEM media (Life Technologies)  
247 supplemented with 10% fetal bovine serum (Atlanta Biologicals), 100 U/mL penicillin and 100  
248 µg/mL streptomycin (Life Technologies). Cells were transfected with plasmid DNA using Polyfect  
249 (Qiagen), according to the manufacturer's instructions. Two days after transfection, cells were  
250 scraped into lysis buffer [50mM Tris-HCl pH 8.0, 150mM NaCl, 0.5% (v/v) Triton X-100, 0.5% (v/v)  
251 NP-40, 0.5% (w/v) deoxycholate, 0.1% (w/v) SDS] supplemented with protease inhibitor cocktail  
252 (Sigma), rotated for 1 hour at 4°C, and pelleted at 21,000xg for 20 minutes at 4°C. Solubilized lysate  
253 was immunoprecipitated using M2-Flag-agarose conjugate (Sigma). Protein samples were  
254 separated using 10% polyacrylamide gels (BioRad), and transferred to nitrocellulose for  
255 immunoblotting. Signals were detected on X-ray film using ECL chemiluminescence reagent (GE).  
256 Anti-GIT1 H-170 antiserum was from Santa Cruz, GIT1 and PKL monoclonal antibodies were from  
257 Becton-Dickinson, p50 β-PIX antiserum was the kind gift of Dr. Rick Cerione (Cornell University),



258 and M2 Flag-peroxidase conjugate and M2 Flag-agarose beads were from Sigma. Secondary anti-  
259 rabbit-HRP and anti-mouse-HRP were from GE, and TrueBlot anti-mouse-HRP was from Rockland.  
260

### 261 **Immunoprecipitation of native GIT2 and GIT1 from brain lysates**

262 An entire mouse brain was homogenized in 10 volumes of lysis buffer with 20 strokes in a Dounce  
263 homogenizer, rotated for 1 hour at 4°C, and pelleted at 21,000xg for 20 minutes at 4°C. Soluble  
264 lysate (1 ml) was immunoprecipitated overnight using 2 µg of PKL monoclonal antibody, which was  
265 raised against chicken GIT2 but recognizes both GIT2 and GIT1 from mammals. Immune complexes  
266 were captured with Protein G/Protein A plus-agarose (Calbiochem) and subjected to Western  
267 blotting using PKL antibody (25 ng/ml) and anti-mouse TrueBlot-HRP secondary. Brains used were  
268 from WT and genetrap GIT2-KO mice, but also GIT1-KO (Schmalzigaug, Rodriguiz et al. 2009) and a  
269 distinct line of GIT2-KO mice made using a traditional NEO replacement strategy (Mazaki,  
270 Hashimoto et al. 2006).

271

### 272 **Statistical analysis**

273 Data were analyzed by one-way or repeated measures ANOVA test for comparison between  
274 genotypes, treatments, or doses (GraphPad Prism 6 software). Individual genotypes, treatments, or  
275 doses were compared using a post-hoc test as indicated in the figure legends whenever ANOVA  
276 showed significance to either genotype or genotype x time interaction. A probability value of  
277  $p < 0.05$  was considered as statistically significant. All data are presented as mean  $\pm$  SEM.

278

279 **Results**

280

281 *GIT2-KO mice do not exhibit ADHD-like behavior*

282

283 A prominent report suggested that mice lacking GIT1 exhibited behavioral abnormalities consistent

284 with an Attention Deficit-Hyperactivity Disorder (ADHD)-like phenotype (Won, Mah et al. 2011).

285 These included basal hyperactivity and psychostimulant-induced locomotor suppression rather

286 than activation, as well as learning and memory deficits. GIT2 has not been examined previously for

287 ADHD-like behavior, although we previously reported that GIT2-KO mice displayed sex-dependent

288 differences in locomotor activity in the first 5 minutes in a novel chamber, consistent with elevated

289 anxiety in female GIT2-deficient mice (Schmalzigaug, Rodriguiz et al. 2009). We therefore examined

290 spontaneous activity of GIT2-deficient mice in more detail by recording locomotor activity over a

291 complete 24-hour diurnal cycle (Fig 1). Following the initial habituation period, GIT2-deficient mice

292 exhibited low activity in the light and higher activity in the dark, but overall levels of activity in

293 either light or dark did not differ significantly by genotype, comparing knockout to wildtype

294 littermates.

295

296 The paradoxical motor calming effect of psychostimulants in ADHD patients is utilized

297 therapeutically, and was reported to occur in mice with a genetrapped inactivation of the *Git1* gene

298 following administration of amphetamine or methylphenidate (Won, Mah et al. 2011). We tested

299 the acute locomotor responses to amphetamine at three doses in GIT2-deficient mice (Fig 2). In no

300 case did amphetamine provoke locomotor suppression. At low amphetamine (0.5 mg/kg), GIT2-

301 deficient mice responded with significant locomotor activation while WT mice did not respond

302 significantly to that dose (Fig 2A,B), while at 1 or 2 mg/kg, both genotypes responded equivalently

303 over the 2h test period (Fig 2B,C and 2D,E). These data suggest that mice lacking GIT2 have

304 increased sensitivity to amphetamine compared to WT, but show that the drug provokes typical  
305 locomotor stimulatory effects in these mice rather than locomotor suppression such as is observed  
306 in ADHD patients.

307

308 *GIT2-KO are not deficient in fear conditioning.*

309

310 A distinct aspect of ADHD, reduced attention and focus, was reported in GIT1-deficient mice as  
311 reduced performance in learning and memory tests (Won, Mah et al. 2011). Indeed, several reports  
312 have shown multiple learning and memory deficits in global GIT1-knockout mice (Schmalzigaug,  
313 Rodriguiz et al. 2009, Menon, Deane et al. 2010, Won, Mah et al. 2011, Martyn, Toth et al. 2018) and  
314 in neuron-specific GIT1-KO mice (Fass, Lewis et al. 2018). Mice lacking GIT2 have not been tested  
315 previously for cognitive function, so we assessed their learning and memory behavior using specific  
316 tests.

317

318 Aversive memory was tested using a classical conditioning paradigm, auditory fear conditioning  
319 (Rodriguiz and Wetsel 2006). Mice were introduced to a novel chamber, and after 2 minutes of  
320 acclimation, a tone was sounded for 30 seconds, terminating with 2 seconds of scrambled footshock  
321 (Fig 3A). Fear was assessed as behavioral freezing, and GIT2-KO showed significantly elevated  
322 freezing behavior immediately after the tone/shock. On the day after conditioning, mice were  
323 reintroduced to the same chamber, with no tone and no shock, and both GIT2-KO and wildtype  
324 mice exhibited a comparably high degree of freezing behavior indicative of normal conditioned  
325 memory of the prior conditioning context (Fig 3B). On the following day, mice were introduced into  
326 a novel chamber, and after 3 minutes, the tone was sounded for 2 minutes but no shock was  
327 presented. GIT2-KO mice exhibited a notable degree of freezing prior to the presentation of the  
328 tone, compared to the WT mice, but both genotypes responded robustly when the tone was

329 presented (Fig 3C). Thus, like WT mice, GIT2-KO mice remember the aversive conditioning to both  
330 the shock context (the original chamber) and to the conditioned tone in a distinct context.

331

332 *Female GIT2-KO mice are selectively deficient in episodic memory*

333

334 Short- and long-term object recognition memory were measured using the novel object test  
335 (Rodríguez and Wetsel 2006). Mice were acclimated to a test arena containing two identical objects,  
336 and then were tested for object memory by replacing one initial object with a distinct novel object.  
337 Since rodents prefer to examine a new object rather than a previously encountered one, the  
338 number of object contacts and time spent interacting with each object was measured to calculate a  
339 preference ratio (Figure 4). At training, neither genotype demonstrated any preference for one  
340 identical object over the other, but mice lacking GIT2 exhibited a significant sex difference in  
341 subsequent testing and were analyzed separately. Male GIT2-KO mice were indistinguishable from  
342 their male WT controls, and preferred to interact with the novel object when tested 20 min after  
343 training (STM) and when tested 24 hr later (LTM) (Figure 4A). In contrast, female GIT2-KO mice  
344 selected the familiar over the novel object in both the STM and the LTM tests, whereas the WT  
345 females strongly preferred the novel object (Figure 4B), suggestive of neophobia in GIT2-KO  
346 females. As a control, the numbers of object contacts were compared for both male and female mice,  
347 and neither differed from wildtype (Figure 4A,B). This neophobia in GIT2-KO females is consistent  
348 with the elevated anxiety phenotype of GIT2-KO mice, particularly females (Schmalzigaug,  
349 Rodríguez et al. 2009). Nonetheless, the female GIT2-KO clearly distinguished between familiar and  
350 novel objects, indicative of effective learning of the familiar object. Collectively, these findings show  
351 that mice lacking GIT2 are able to learn to differentiate between novel and previously encountered  
352 objects.

353

354 *GIT2 KO mice show normal spatial learning and memory*

355

356 Spatial learning was assessed using the Morris water maze, where mice are trying to escape the  
357 water and have to learn the location of the hidden platform. (Rodríguez and Wetsel 2006). GIT2-  
358 KO and WT mice reduced their total distance to locate the hidden platform on successive days, and  
359 did not differ between genotypes, indicative of normal spatial learning behavior (Fig 5A). After the  
360 acquisition-learning phase, the platform was moved to a new location, and reversal learning was  
361 assessed. GIT2-KO and WT mice rapidly learned the new location, as assessed by swim distance,  
362 and did not differ by genotype. During acquisition and reversal learning, probe trials with the  
363 platform absent were conducted to examine the evolution of search strategy over time, and during  
364 both acquisition and reversal training, both WT and GIT2-KO mice increasingly spent more time in  
365 the quadrant that had contained the platform and less time in other quadrants, and did not differ by  
366 genotype (Fig 5B,C). GIT2-KO swam significantly more slowly than WT mice in both test phases (Fig  
367 5D), but not slowly enough to affect interpretation of the results as a learning paradigm. As a  
368 control, the visible platform variant of the water maze test was performed, and both GIT2-KO and  
369 WT controls rapidly found the platform (Fig 5E), but the GIT2-KO continued to demonstrate  
370 reduced swimming speed (Fig 5F).

371

372 *GIT2-KO reduces hippocampal dendritic spine density without affecting LTP*

373

374 Altered learning behavior often is associated with reduced dendritic spine density and with spine  
375 immaturity, in human intellectual disability patients and in mouse models exhibiting poor learning  
376 (Levenga and Willemsen 2012, Ba, van der Raadt et al. 2013). The GIT partner  $\alpha$ -PIX and the  
377 GIT/PIX partner PAK3 are both known human X-linked intellectual disability genes, and are  
378 thought to affect the same pathway (Allen, Gleeson et al. 1998, Kutsche, Yntema et al. 2000, Ba, van  
379 der Raadt et al. 2013). Mice lacking  $\alpha$ -PIX (Ramakers, Wolfer et al. 2012) or PAK1 plus PAK3

380 (Huang, Zhou et al. 2011), exhibit profound learning deficits together with altered dendritic spine  
381 density, as do GIT1-deficient mice (Menon, Deane et al. 2010, Martyn, Toth et al. 2018). We  
382 therefore examined the density of hippocampal dendritic spines in the absence of GIT2. We used 2-  
383 photon microscopy to image cultured brain slices from post-natal pups that were infected with  
384 EGFP in order to assess both spine density and spine morphology. Hippocampal CA1 neurons in  
385 brain slices from GIT2-knockout mice demonstrated a reduced density of dendritic spines (Fig  
386 6A,B). However, analysis of spine morphology revealed that the distribution of thin, mushroom and  
387 knobby spines was not altered by the absence of GIT2 (Fig 6C). Thus GIT2 does appear to regulate  
388 dendritic spines (perhaps by affecting the probability of formation or spine stability), but does not  
389 appear to affect maturation *per se* as assessed by the distribution of morphological types.

390

391 To directly assess synaptic plasticity, brain slices from GIT2-knockout mice were subjected to  
392 electrophysiological recording of hippocampal CA1 neurons to measure long-term potentiation of  
393 glutamate-induced excitatory synaptic currents. Consistent with the normal performance of GIT2  
394 knockout mice in learning and memory tests, but surprisingly in light of reduced GIT2-KO spine  
395 number, hippocampal CA1 neurons from GIT2-deficient mice exhibited normal LTP (Fig 7).

396

397 *GIT2-KO differs from GIT1-KO due to the inability of brain GIT2 to form GIT/PIX complexes*

398

399 Overall, the behavioral phenotypes of GIT1-deficient versus GIT2-deficient mice appear quite  
400 distinct. Loss of GIT1 leads to poor learning and memory behavior and is associated with reduced  
401 synaptic structural plasticity, whereas loss of GIT2 leads to elevated anxiety but has no significant  
402 effect on learning and memory and is associated with normal synaptic plasticity. This is unexpected,  
403 since GIT1 and GIT2 are widely expressed throughout the brain (Schmalzigaug, Phee et al. 2007),  
404 are capable of heterodimerizing within GIT/PIX complexes in cells that co-express the two isoforms

405 (Premont, Perry et al. 2004), and share Arf GAP function and multiple protein partners (Premont,  
406 Claing et al. 2000, Zhou, Li et al. 2016). Loss of GIT1 in the brain leads to a substantial reduction in  
407 PIX levels (Won, Mah et al. 2011), and a recent report demonstrated a similar loss of PIX in immune  
408 tissues from GIT2-deficient mice, and showed that this was a result of destabilization of GIT-free  
409 PIX rather than altered gene transcription (Hao, He et al. 2015). However, immunoblotting for  $\beta$ -  
410 PIX in hippocampal lysates from GIT2-KO and WT mice revealed that PIX levels are *not* reduced in  
411 the absence of GIT2, while we confirm that PIX proteins are reduced dramatically in the absence of  
412 GIT1 (Fig 8). There also was no apparent compensatory up-regulation of GIT1 expression in GIT2-  
413 KO mice, which might have explained why PIX levels remain high. This suggests that brain GIT2  
414 must somehow act quite differently from brain GIT1 or immune cell GIT2 with regard to  
415 complexing with and stabilizing PIX proteins.

416

417 To better understand the mechanistic basis for these fundamental differences between GIT2 and  
418 GIT1 function, we examined GIT2 in the brain in more detail. Specifically, from the first description  
419 of GIT2, it has been known that the *Git2* transcript undergoes extensive, tissue-specific alternative  
420 mRNA splicing of five contiguous internal sequences (encoded by 4 in-frame exons) leading to  
421 potentially over 30 variants (Premont, Claing et al. 2000). Comparative characterization of the  
422 longest and shortest GIT2 forms demonstrated that many properties are common to both variants,  
423 including Arf GAP activity and formation of GIT/PIX complexes (Premont, Claing et al. 2000).  
424 However, other GIT2 isoforms have never been compared directly. To identify the GIT2 splice  
425 variants expressed in the brain, total RNA was isolated from mouse hippocampus and amygdala  
426 and used in reverse transcription PCR with a primer pair spanning the alternatively spliced region,  
427 with an expected product of 820bp for the longest form of GIT2. A single product band of 570bp  
428 was obtained in both cases, and these were excised and subjected to DNA sequencing using the two  
429 amplification primers. Comparison of the resulting sequences to full-length mouse GIT2 revealed a

430 loss of two blocks of sequences, corresponding to regions B and C together (coding exon 14) and  
431 region E (coding exon 16) (Fig 9A). This variant is described from mouse and several other species  
432 (including human) in the GenBank database as GIT2 isoform 3. Aligning this GIT2( $\Delta$ BCE) variant  
433 with the previously characterized GIT2-long and GIT2-short, it is apparent that the BC region  
434 contains most of the coiled-coil sequence that mediates GIT protein dimerization (Kim, Ko et al.  
435 2003, Paris, Longhi et al. 2003, Premont, Perry et al. 2004, Schlenker and Rittinger 2009). The effect  
436 of the loss of this BC region has not been reported.

437  
438 The longest form of GIT2 is co-linear with GIT1, and recombinant GIT2-long migrates at the same  
439 apparent size as GIT1 on SDS-PAGE (Premont, Claing et al. 2000). In our hands, the quality of anti-  
440 GIT2 antisera available commercially, or of several sera we have raised ourselves, is inadequate to  
441 cleanly detect native brain GIT2 without also cross-reacting with GIT1 or detecting contaminant  
442 bands that do not disappear in knockout samples. Thus, few groups have reported clear detection of  
443 native GIT2 variants without simultaneous detection of GIT1, particularly with unambiguous  
444 knockout or antigen-block controls (Schmalzigaug, Rodriguiz et al. 2009, Totaro, Tavano et al.  
445 2012). To circumvent this problem, we utilized the PKL (chicken GIT2) monoclonal antibody, which  
446 strongly binds to both GIT2 and GIT1, to immunoprecipitate the native GIT proteins from wildtype  
447 or GIT knockout brain for subsequent Western blotting (Fig 9B). In wildtype brain, a strong 95 kDa  
448 band and a weaker 85 kDa band are seen. PKL antibody immunoprecipitates from GIT1-KO brain  
449 lack the 95 kDa band, while PKL antibody immunoprecipitates from brains of two distinct GIT2-KO  
450 strains (our own genetrapp line and the traditional NEO replacement line from the Sabe lab (Mazaki,  
451 Hashimoto et al. 2006)) lack the lower p85 band. This unambiguously identifies the upper p95 band  
452 as GIT1 and the lower p85 band as GIT2, and demonstrates that the predominant form of GIT2 in  
453 the mouse brain is a molecular form that is substantially shorter than GIT1 or GIT2-long, consistent



454 with our RNA amplification data identifying GIT2( $\Delta$ BCE). There appears to be very little GIT2-long  
455 protein (that is, migrating at the same apparent size as GIT1) in the mouse brain.

456

457 We created the human GIT2( $\Delta$ BCE) expression construct, and used this to examine the ability of  
458 this brain form of GIT2 to dimerize (Fig 10A). GIT2( $\Delta$ BCE) was well expressed, and as expected  
459 exhibited notably faster migration in SDS-PAGE compared to GIT2-long. In contrast to the clear  
460 dimerization ability of GIT2-long, GIT2( $\Delta$ BCE) lacks the ability to dimerize with and thus strongly  
461 co-immunoprecipitate with native GIT1.

462

463 Because GIT protein dimerization plays an important role in forming the multimeric GIT/PIX  
464 complex (Premont, Perry et al. 2004), we also assessed the ability of GIT2( $\Delta$ BCE) to tightly  
465 associate with PIX proteins in GIT/PIX complexes (Fig 10B). COS7 cells express several  $\beta$ -PIX  
466 variants, and these native proteins abundantly co-immunoprecipitated with GIT2-long after  
467 forming GIT2/ $\beta$ -PIX complexes. However, GIT2( $\Delta$ BCE) only weakly co-immunoprecipitated native  
468  $\beta$ -PIX, consistent with reduced ability to form oligomeric GIT/PIX complexes. Instead, there is a  
469 very low but significant level of  $\beta$ -PIX associated with GIT2( $\Delta$ BCE) over background, consistent  
470 with weak binding of  $\beta$ -PIX solely to the intact Spa2 domain of the GIT2( $\Delta$ BCE) monomer, as we  
471 have seen previously for a GIT1 mutant lacking the coiled-coil dimerization domain (Premont,  
472 Perry et al. 2004).

473

474 **Discussion**

475

476 In biochemical assays, GIT1 and GIT2 have generally appeared to be interchangeable (Premont,  
477 Claing et al. 2000, Vitale, Patton et al. 2000). In the brain, GIT1 and GIT2 appear to be present in  
478 nearly all neurons (Schmalzigaug, Phee et al. 2007). Since the two GIT proteins can readily  
479 heterodimerize as well as homodimerize in model cells (Premont, Perry et al. 2004), they have been  
480 presumed to be functionally redundant. However, a few studies have suggested distinct functions  
481 or distinct regulation of GIT1 and GIT2 (Brown, Cary et al. 2005, Frank, Adelstein et al. 2006,  
482 Schmalzigaug, Garron et al. 2007).

483

484 With the behavioral analysis of GIT2-deficient mice presented here, it is now very clear that GIT2-  
485 KO and GIT1-KO mice exhibit very distinct learning and memory phenotypes: GIT1-KO are  
486 markedly deficient in learning, while GIT2-KO are grossly normal. This is the first demonstration of  
487 learning and memory function in the absence of GIT2.

488

489 We find no support for the hypothesis that loss of GIT2 might lead to an ADHD-like phenotype, as  
490 has been reported for GIT1. The linkage of GIT1 to ADHD has become controversial, as we are  
491 unable to demonstrate ADHD-like behavior in GIT1-knockout mice in our tests (Martyn, Toth et al.  
492 2018), and additional human association studies have not found an association between ADHD and  
493 GIT1 polymorphisms in several human populations (Salatino-Oliveira, Genro et al. 2012, Klein, van  
494 der Voet et al. 2015). Here we show that GIT2-KO exhibit normal spontaneous locomotor activity  
495 rather than basal hyperactivity, and fail to show evidence of amphetamine-induced locomotor  
496 suppression. However, GIT2-KO mice do not respond normally to amphetamine, since they exhibit  
497 increased sensitivity to this drug, responding to a low dose that does not activate locomotion in  
498 wildtype littermates. In contrast, loss of GIT1 leads to reduced sensitivity to amphetamine in our

499 hands (Martyn, Toth et al. 2018). Recent reports that GIT proteins affect presynaptic  
500 neurotransmitter release (Podufall, Tian et al. 2014, Montesinos, Dong et al. 2015) confirms that  
501 GIT proteins have both presynaptic and postsynaptic roles, so further study will be required to  
502 understand how GIT2 and GIT1 differentially affect amphetamine sensitivity.  
503  
504 In our original characterization of GIT2, the extensive tissue-specific alternative splicing of this  
505 transcript was examined functionally by comparing only the GIT2-long and GIT2-short variants  
506 (Premont, Claing et al. 2000). Both of these forms were capable of binding strongly to PIX proteins  
507 to form GIT2/PIX complexes. However, they differed in the ability to bind to paxillin, as this  
508 interaction is mediated by the carboxyl terminal focal adhesion-targeting domain (Schmalzigaug,  
509 Garron et al. 2007) that is absent in GIT2-short, which has a truncated carboxyl terminus lacking  
510 the alternative D and E exons as well as the conserved FAT domain. From the present work, it is  
511 clear that this initial comparison was insufficient, since it did not assess the effects of loss of the of  
512 alternatively-spliced regions A, B and C. Since that time, no other studies have compared GIT2  
513 variants, and the effects of alternative splicing have been ignored. In particular, the lack of avid,  
514 specific GIT2 antisera has hampered efforts to more carefully examine tissue-specific splicing,  
515 although it is clear that native GIT2 comes in multiple forms (Schmalzigaug, Rodriguiz et al. 2009).  
516 Further effort is needed to clarify potentially distinct roles of other GIT2 splice variants.  
517  
518 Interestingly, studies from the Cerione lab have all used their mouse GIT2 clone, called “CAT2”,  
519 which is a  $\Delta BC$  variant (Bagrodia, Bailey et al. 1999). Because neither these workers nor anyone  
520 else has ever directly compared this GIT2( $\Delta BC$ ) to any GIT2 form containing the BC region, the  
521 assumption has been made that the PIX interaction they measured using “CAT2” was as robust as  
522 that reported by other groups using GIT2 forms containing the BC region. Now it seems likely that  
523 their reported interaction was only the very weak association of a GIT2 monomer with PIX (as seen

524 Fig 10B). In the absence of this comparison, the Cerione group created models for how PIX is  
525 activated by GIT2( $\Delta$ BC) assuming association and dissociation of monomeric GIT2 and PIX (Feng,  
526 Baird et al. 2004, Baird, Feng et al. 2005) that seemed to make little sense in the context of tightly-  
527 associated oligomeric GIT/PIX complexes, but which are clearly possible with weak monomeric  
528 association with GIT2( $\Delta$ BC) or GIT2( $\Delta$ BCE). Further work is clearly needed here to compare how  
529 weak association of monomeric GIT2( $\Delta$ BC) or GIT2( $\Delta$ BCE) with PIX may lead to PIX activation,  
530 versus how PIX is activated within stable oligomeric GIT/PIX complexes (which, it is now clear, has  
531 never been tested directly). Similarly, we predict that any GIT2 variants, in any tissue, lacking the B  
532 or C regions may similarly be unable to assemble into GIT dimers or further into oligomeric  
533 GIT/PIX complexes.

534  
535 These results also highlight a common misunderstanding in the literature about the association of  
536 GIT proteins with PIX proteins. The PIX binding site on GIT1 was mapped by the Manser lab to the  
537 Spa2 repeats using a recombinant protein overlay technique that excluded oligomeric binding  
538 (Zhao, Manser et al. 2000). Our own work using co-immunoprecipitation of complexes from cells  
539 indicated that loss of the Spa2 repeats from GIT1, either through point mutations or complete  
540 deletion, is insufficient to prevent GIT association with PIX, and that in cells, GIT protein coiled-coil  
541 dimeric interactions are critical to assembling GIT/PIX complexes (Premont, Perry et al. 2004). For  
542 GIT1, and all GIT2 variants containing the complete coiled-coil region (+BC), we predict that these  
543 proteins will exist primarily if not exclusively within stable oligomeric GIT/PIX complexes, while  
544 GIT2 forms lacking the BC region will be primarily monomeric and only loosely and transiently  
545 associated with PIX trimers. It remains unknown what amount of cellular PIX is found as free PIX  
546 trimer, unassociated with GIT/PIX complexes, but the very substantial loss of brain PIX protein in  
547 the absence of GIT1 (Won, Mah et al. 2011)(Fig 8) but not in the absence of GIT2 (that is, mainly  
548 GIT2( $\Delta$ BCE)) suggests that in the brain most PIX is found within multimeric GIT1/PIX complexes

549 with only a minor fraction that is only loosely bound to monomeric GIT2( $\Delta$ BCE) and other variants  
550 like it. Instead, the small amount of PIX interaction with GIT2( $\Delta$ BCE) is consistent with loose  
551 association of one GIT2( $\Delta$ BCE) with PIX solely through Spa2 interactions. Additionally,  $\beta$ -PIX in  
552 particular also exists as multiple splice variants, one class of which lacks the coiled-coil region  
553 responsible for PIX trimerization (Kim, Kim et al. 2000, Koh, Manser et al. 2001). It is thus tempting  
554 to speculate that dimerization-deficient GIT2 monomers associate primarily with trimerization-  
555 deficient  $\beta$ -PIX forms in a loose, regulated association of two monomers, in contrast to the  
556 apparently constitutive GIT/PIX oligomers assembled from GIT and PIX protein variants containing  
557 functional coiled-coil domains.

558  
559 There are several functional consequences of brain GIT2( $\Delta$ BCE) not forming oligomeric GIT2/PIX  
560 complexes. In the absence of GIT2 expression, the native GIT1 is able to maintain normal levels of  
561 PIX proteins in the brain through stabilization within GIT1/PIX complexes. That is, mice lacking  
562 GIT2 have near-normal GIT/PIX complex levels and localization, which are able to scaffold PAK  
563 appropriately within synapses. Other partners requiring intact GIT/PIX complexes for proper  
564 localization and function (Zhou, Li et al. 2016) also should be relatively unaffected by loss of GIT2 in  
565 the brain. The inability to properly localize PAK function in the absence of GIT1 leads to abnormal  
566 hippocampal synaptic structural plasticity (Martyn, Toth et al. 2018) and presumably also to  
567 defective long-term potentiation, and thus poor learning and memory behavior; whereas all these  
568 functions are normal (or are expected to be) in GIT2-deficient mice.

569  
570 On the other hand, hippocampal neuron dendritic spine density is reduced similarly by loss of  
571 either GIT2 (shown here) or GIT1 (Menon, Deane et al. 2010, Martyn, Toth et al. 2018), suggesting  
572 that this role of GIT proteins does not require scaffolding or crosstalk within GIT/PIX complexes. A  
573 report suggesting that the ArfGAP function of GIT1 is important for regulating spine stability

574 (Rocca, Amici et al. 2013) hints that GIT2 might also regulate spines in an Arf-dependent manner,  
575 independent of PIX or of PIX partners such as PAK.

576

577 Overall, we conclude that GIT2( $\Delta$ BCE), a prominent GIT2 isoform in the hippocampus and amygdala  
578 and throughout the entire brain, is unable to dimerize or participate in oligomeric GIT/PIX  
579 complexes, and therefore cannot affect PIX-dependent pathways (particularly PAK pathways) that  
580 appear to be critical for supporting learning and memory function. Thus global loss of GIT2, and  
581 particularly of this brain GIT2( $\Delta$ BCE) variant, does not lead to noticeable loss of brain PIX protein  
582 due to destabilization, nor to the severe learning deficits observed in GIT1-KO or  $\alpha$ -PIX-KO mice.

583

584

#### 585 **Acknowledgements**

586

587 We thank Pamela Bonner for mouse husbandry and genotyping, Shivani Salunke for assistance with  
588 spine density measurements, Rick Cerione (Cornell University, Ithaca, New York) for the p50  $\beta$ -PIX  
589 antiserum, and Hisatake Sabe (Hokkaido University, Sapporo, Japan) and Yuichi Mazaki (Kumamoto  
590 University, Kumamoto, Japan) for the NEO replacement GIT2-knockout mouse line.

591

592 Supported by NIH R21 MH090556 and Department of Defense Medical Research and Development  
593 Program (DMRDP) contract W81XWH-11-2-0112 to RTP. The funders had no role in study design,  
594 data collection and analysis, decision to publish, or preparation of the manuscript.

595

## 596 **References**

- 597 Allen, K. M., J. G. Gleeson, S. Bagrodia, M. W. Partington, J. C. MacMillan, R. A. Cerione, J. C. Mulley and  
598 C. A. Walsh (1998). "PAK3 mutation in nonsyndromic X-linked mental retardation." Nat Genet  
599 **20**(1): 25-30.
- 600 Anagnostaras, S. G., S. A. Josselyn, P. W. Frankland and A. J. Silva (2000). "Computer-assisted  
601 behavioral assessment of Pavlovian fear conditioning in mice." Learn Mem **7**(1): 58-72.
- 602 Ba, W., J. van der Raadt and N. Nadif Kasri (2013). "Rho GTPase signaling at the synapse:  
603 implications for intellectual disability." Exp Cell Res **319**(15): 2368-2374.
- 604 Bagrodia, S., D. Bailey, Z. Lenard, M. Hart, J. L. Guan, R. T. Premont, S. J. Taylor and R. A. Cerione  
605 (1999). "A tyrosine-phosphorylated protein that binds to an important regulatory region on the  
606 cool family of p21-activated kinase-binding proteins." J Biol Chem **274**(32): 22393-22400.
- 607 Baird, D., Q. Feng and R. A. Cerione (2005). "The Cool-2/ $\alpha$ -Pix protein mediates a Cdc42-Rac  
608 signaling cascade." Curr Biol **15**(1): 1-10.
- 609 Bastrikova, N., G. A. Gardner, J. M. Reece, A. Jeromin and S. M. Dudek (2008). "Synapse elimination  
610 accompanies functional plasticity in hippocampal neurons." Proc Natl Acad Sci U S A **105**(8): 3123-  
611 3127.
- 612 Brown, M. C., L. A. Cary, J. S. Jamieson, J. A. Cooper and C. E. Turner (2005). "Src and FAK kinases  
613 cooperate to phosphorylate paxillin kinase linker, stimulate its focal adhesion localization, and  
614 regulate cell spreading and protrusiveness." Mol Biol Cell **16**(9): 4316-4328.
- 615 Chapleau, C. A., M. E. Carlo, J. L. Larimore and L. Pozzo-Miller (2008). "The actions of BDNF on  
616 dendritic spine density and morphology in organotypic slice cultures depend on the presence of  
617 serum in culture media." J Neurosci Methods **169**(1): 182-190.
- 618 Fass, D. M., M. C. Lewis, R. Ahmad, M. J. Szucs, Q. Zhang, M. Fleishman, D. Wang, M. J. Kim, J. Biag, S. A.  
619 Carr, E. M. Scolnick, R. T. Premont and S. J. Haggarty (2018). Brain-Specific Deletion of GIT1 Impairs  
620 Cognition and Alters Phosphorylation of Synaptic Protein Networks Implicated in Schizophrenia  
621 Susceptibility. B. M. Massachusetts General Hospital, BioRxiv.
- 622 Feng, Q., D. Baird and R. A. Cerione (2004). "Novel regulatory mechanisms for the Dbl family  
623 guanine nucleotide exchange factor Cool-2/ $\alpha$ -Pix." EMBO J **23**(17): 3492-3504.
- 624 Frank, S. R., M. R. Adelstein and S. H. Hansen (2006). "GIT2 represses Crk- and Rac1-regulated cell  
625 spreading and Cdc42-mediated focal adhesion turnover." EMBO J **25**(9): 1848-1859.
- 626 Hao, Y. E., D. F. He, R. H. Yin, H. Chen, J. Wang, S. X. Wang, Y. Q. Zhan, C. H. Ge, C. Y. Li, M. Yu and X. M.  
627 Yang (2015). "GIT2 deficiency attenuates concanavalin A-induced hepatitis in mice." FEBS Open Bio  
628 **5**: 688-704.
- 629 Huang, W., Z. Zhou, S. Asrar, M. Henkelman, W. Xie and Z. Jia (2011). "p21-Activated kinases 1 and 3  
630 control brain size through coordinating neuronal complexity and synaptic properties." Mol Cell Biol  
631 **31**(3): 388-403.
- 632 Kim, S., T. Kim, D. Lee, S. H. Park, H. Kim and D. Park (2000). "Molecular cloning of neuronally  
633 expressed mouse betaPix isoforms." Biochem Biophys Res Commun **272**(3): 721-725.
- 634 Kim, S., J. Ko, H. Shin, J. R. Lee, C. Lim, J. H. Han, W. D. Altmann, C. C. Garner, E. D. Gundelfinger, R. T.  
635 Premont, B. K. Kaang and E. Kim (2003). "The GIT family of proteins forms multimers and  
636 associates with the presynaptic cytomatrix protein Piccolo." J Biol Chem **278**(8): 6291-6300.
- 637 Klein, M., M. van der Voet, B. Harich, K. J. van Hulzen, A. M. Onnink, M. Hoogman, T. Guadalupe, M.  
638 Zwiers, J. M. Groothuisink, A. Verberkt, B. Nijhof, A. Castells-Nobau, S. V. Faraone, J. K. Buitelaar, A.  
639 Schenck, A. Arias-Vasquez, B. Franke and A. W. G. Psychiatric Genomics Consortium (2015).  
640 "Converging evidence does not support GIT1 as an ADHD risk gene." Am J Med Genet B  
641 Neuropsychiatr Genet **168**(6): 492-507.
- 642 Koh, C. G., E. Manser, Z. S. Zhao, C. P. Ng and L. Lim (2001). "Beta1PIX, the PAK-interacting exchange  
643 factor, requires localization via a coiled-coil region to promote microvillus-like structures and  
644 membrane ruffles." J Cell Sci **114**(Pt 23): 4239-4251.



645 Kutsche, K., H. Yntema, A. Brandt, I. Jantke, H. G. Nothwang, U. Orth, M. G. Boavida, D. David, J. Chelly,  
646 J. P. Fryns, C. Moraine, H. H. Ropers, B. C. Hamel, H. van Bokhoven and A. Gal (2000). "Mutations in  
647 ARHGEF6, encoding a guanine nucleotide exchange factor for Rho GTPases, in patients with X-  
648 linked mental retardation." *Nat Genet* **26**(2): 247-250.

649 Levenga, J. and R. Willemsen (2012). "Perturbation of dendritic protrusions in intellectual  
650 disability." *Prog Brain Res* **197**: 153-168.

651 Martyn, A. C., K. Toth, R. Schmalzigaug, N. G. Hedrick, R. M. Rodriguiz, R. Yasuda, W. C. Wetsel and R.  
652 T. Premont (2018). "GIT1 regulates synaptic structural plasticity underlying learning." *PLoS One*  
653 **13**(3): e0194350.

654 Mazaki, Y., S. Hashimoto, T. Tsujimura, M. Morishige, A. Hashimoto, K. Aritake, A. Yamada, J. M. Nam,  
655 H. Kiyonari, K. Nakao and H. Sabe (2006). "Neutrophil direction sensing and superoxide production  
656 linked by the GTPase-activating protein GIT2." *Nat Immunol* **7**(7): 724-731.

657 Menon, P., R. Deane, A. Sagare, S. M. Lane, T. J. Zarccone, M. R. O'Dell, C. Yan, B. V. Zlokovic and B. C.  
658 Berk (2010). "Impaired spine formation and learning in GPCR kinase 2 interacting protein-1 (GIT1)  
659 knockout mice." *Brain Res* **1317**: 218-226.

660 Missy, K., B. Hu, K. Schilling, A. Harenberg, V. Sakk, K. Kuchenbecker, K. Kutsche and K. D. Fischer  
661 (2008). "AlphaPIX Rho GTPase guanine nucleotide exchange factor regulates lymphocyte functions  
662 and antigen receptor signaling." *Mol Cell Biol* **28**(11): 3776-3789.

663 Montesinos, M. S., W. Dong, K. Goff, B. Das, D. Guerrero-Given, R. Schmalzigaug, R. T. Premont, R.  
664 Satterfield, N. Kamasawa and S. M. Young, Jr. (2015). "Presynaptic Deletion of GIT Proteins Results  
665 in Increased Synaptic Strength at a Mammalian Central Synapse." *Neuron* **88**(5): 918-925.

666 Paris, S., R. Longhi, P. Santambrogio and I. de Curtis (2003). "Leucine-zipper-mediated homo- and  
667 hetero-dimerization of GIT family p95-ARF GTPase-activating protein, PIX-, paxillin-interacting  
668 proteins 1 and 2." *Biochem J* **372**(Pt 2): 391-398.

669 Podufall, J., R. Tian, E. Knoche, D. Puchkov, A. M. Walter, S. Rosa, C. Quentin, A. Vukoja, N. Jung, A.  
670 Lampe, C. Wichmann, M. Bohme, H. Depner, Y. Q. Zhang, J. Schmoranzner, S. J. Sigrist and V. Haucke  
671 (2014). "A presynaptic role for the cytomatrix protein GIT in synaptic vesicle recycling." *Cell Rep*  
672 **7**(5): 1417-1425.

673 Porton, B., R. M. Rodriguiz, L. E. Phillips, J. W. t. Gilbert, J. Feng, P. Greengard, H. T. Kao and W. C.  
674 Wetsel (2010). "Mice lacking synapsin III show abnormalities in explicit memory and conditioned  
675 fear." *Genes Brain Behav* **9**(3): 257-268.

676 Premont, R. T., A. Claing, N. Vitale, J. L. Freeman, J. A. Pitcher, W. A. Patton, J. Moss, M. Vaughan and  
677 R. J. Lefkowitz (1998). "beta2-Adrenergic receptor regulation by GIT1, a G protein-coupled receptor  
678 kinase-associated ADP ribosylation factor GTPase-activating protein." *Proc Natl Acad Sci U S A*  
679 **95**(24): 14082-14087.

680 Premont, R. T., A. Claing, N. Vitale, S. J. Perry and R. J. Lefkowitz (2000). "The GIT family of ADP-  
681 ribosylation factor GTPase-activating proteins. Functional diversity of GIT2 through alternative  
682 splicing." *J Biol Chem* **275**(29): 22373-22380.

683 Premont, R. T., S. J. Perry, R. Schmalzigaug, J. T. Roseman, Y. Xing and A. Claing (2004). "The GIT/PIX  
684 complex: an oligomeric assembly of GIT family ARF GTPase-activating proteins and PIX family  
685 Rac1/Cdc42 guanine nucleotide exchange factors." *Cell Signal* **16**(9): 1001-1011.

686 Ramakers, G. J., D. Wolfer, G. Rosenberger, K. Kuchenbecker, H. J. Kreienkamp, J. Prange-Kiel, G.  
687 Rune, K. Richter, K. Langnaese, S. Masneuf, M. R. Bosl, K. D. Fischer, H. J. Krugers, H. P. Lipp, E. van  
688 Galen and K. Kutsche (2012). "Dysregulation of Rho GTPases in the alphaPix/Arhgef6 mouse model  
689 of X-linked intellectual disability is paralleled by impaired structural and synaptic plasticity and  
690 cognitive deficits." *Hum Mol Genet* **21**(2): 268-286.

691 Rocca, D. L., M. Amici, A. Antoniou, E. Blanco Suarez, N. Halemani, K. Murk, J. McGarvey, N. Jaafari, J.  
692 R. Mellor, G. L. Collingridge and J. G. Hanley (2013). "The small GTPase Arf1 modulates Arp2/3-  
693 mediated actin polymerization via PICK1 to regulate synaptic plasticity." *Neuron* **79**(2): 293-307.



694 Rodriguiz, R. M. and W. C. Wetsel (2006). Assessments of Cognitive Deficits in Mutant Mice. Animal  
695 Models of Cognitive Impairment. E. D. Levin and J. J. Buccafusco. Boca Raton (FL).  
696 Salatino-Oliveira, A., J. P. Genro, R. Chazan, C. Zeni, M. Schmitz, G. Polanczyk, T. Roman, L. A. Rohde  
697 and M. H. Hutz (2012). "Association study of GIT1 gene with attention-deficit hyperactivity disorder  
698 in Brazilian children and adolescents." Genes Brain Behav **11**(7): 864-868.  
699 Schlenker, O. and K. Rittinger (2009). "Structures of dimeric GIT1 and trimeric beta-PIX and  
700 implications for GIT-PIX complex assembly." J Mol Biol **386**(2): 280-289.  
701 Schmalzigaug, R., M. L. Garron, J. T. Roseman, Y. Xing, C. E. Davidson, S. T. Arold and R. T. Premont  
702 (2007). "GIT1 utilizes a focal adhesion targeting-homology domain to bind paxillin." Cell Signal  
703 **19**(8): 1733-1744.  
704 Schmalzigaug, R., H. Phee, C. E. Davidson, A. Weiss and R. T. Premont (2007). "Differential  
705 expression of the ARF GAP genes GIT1 and GIT2 in mouse tissues." J Histochem Cytochem **55**(10):  
706 1039-1048.  
707 Schmalzigaug, R., R. M. Rodriguiz, P. E. Bonner, C. E. Davidson, W. C. Wetsel and R. T. Premont  
708 (2009). "Impaired fear response in mice lacking GIT1." Neurosci Lett **458**(2): 79-83.  
709 Schmalzigaug, R., R. M. Rodriguiz, L. E. Phillips, C. E. Davidson, W. C. Wetsel and R. T. Premont  
710 (2009). "Anxiety-like behaviors in mice lacking GIT2." Neurosci Lett **451**(2): 156-161.  
711 Simons, S. B., Y. Escobedo, R. Yasuda and S. M. Dudek (2009). "Regional differences in hippocampal  
712 calcium handling provide a cellular mechanism for limiting plasticity." Proc Natl Acad Sci U S A  
713 **106**(33): 14080-14084.  
714 Totaro, A., S. Tavano, G. Filosa, A. Gartner, R. Pennucci, P. Santambrogio, A. Bachi, C. G. Dotti and I. de  
715 Curtis (2012). "Biochemical and functional characterisation of alphaPIX, a specific regulator of  
716 axonal and dendritic branching in hippocampal neurons." Biol Cell **104**(9): 533-552.  
717 van Gastel, J., J. Boddaert, A. Jushaj, R. T. Premont, L. M. Luttrell, J. Janssens, B. Martin and S.  
718 Maudsley (2018). "GIT2-A keystone in ageing and age-related disease." Ageing Res Rev **43**: 46-63.  
719 Vitale, N., W. A. Patton, J. Moss, M. Vaughan, R. J. Lefkowitz and R. T. Premont (2000). "GIT proteins,  
720 A novel family of phosphatidylinositol 3,4, 5-trisphosphate-stimulated GTPase-activating proteins  
721 for ARF6." J Biol Chem **275**(18): 13901-13906.  
722 Won, H., W. Mah, E. Kim, J. W. Kim, E. K. Hahm, M. H. Kim, S. Cho, J. Kim, H. Jang, S. C. Cho, B. N. Kim,  
723 M. S. Shin, J. Seo, J. Jeong, S. Y. Choi, D. Kim, C. Kang and E. Kim (2011). "GIT1 is associated with  
724 ADHD in humans and ADHD-like behaviors in mice." Nat Med **17**(5): 566-572.  
725 Zhang, H., D. J. Webb, H. Asmussen and A. F. Horwitz (2003). "Synapse formation is regulated by the  
726 signaling adaptor GIT1." J Cell Biol **161**(1): 131-142.  
727 Zhao, Z. S., E. Manser, T. H. Loo and L. Lim (2000). "Coupling of PAK-interacting exchange factor PIX  
728 to GIT1 promotes focal complex disassembly." Mol Cell Biol **20**(17): 6354-6363.  
729 Zhou, W., X. Li and R. T. Premont (2016). "Expanding functions of GIT Arf GTPase-activating  
730 proteins, PIX Rho guanine nucleotide exchange factors and GIT-PIX complexes." J Cell Sci **129**(10):  
731 1963-1974.

732

733 **Figure Legends**

734

735 **Figure 1**

736

737 Spontaneous locomotor activity in GIT2 genetrapped mice. A) GIT2 WT (n=5, black circle) and GIT2 KO  
738 (n=5, open circle) mice were placed in the open field for 24 hours under the normal 12:12hr  
739 light:dark cycle. Distance traveled (m) in each 30 min period is shown. Statistical analysis using  
740 repeated measures ANOVA showed no significant difference between genotypes for activity  
741 measured in the dark or in the light over the entire test period.

742

743

744 **Figure 2**

745

746 Amphetamine-induced locomotor activity in GIT2 genetrapped mice. GIT2 WT (black circle) and GIT2  
747 KO (open circle) mice were habituated to the locomotor chamber for 60 min prior to drug injection.  
748 A) GIT2 WT (n=10) and KO (n=9) mice were injected with 0.5mg/kg amphetamine, and locomotor  
749 activity is shown in 5 min windows.  $p < 0.001$  in a two-way repeated measures ANOVA between  
750 genotypes over time; \*  $p < 0.05$ , \*\*  $p < 0.01$  within time using a Holm-Sidak post-hoc test. B) Total  
751 locomotor activity summed for the 2h following 0.5mg/kg amphetamine injection. \*\*\*\*  $p < 0.001$   
752 using t-test. GIT2 WT (n=9) and KO (n=11) mice were injected with 1mg/kg amphetamine, and are  
753 shown as locomotor activity in 5 min windows (C) or summed over 2h after drug (D). No significant  
754 differences. GIT2 WT (n=10) and KO (n=10) mice were injected with 2mg/kg amphetamine, and are  
755 shown as locomotor activity in 5 min windows (E) or summed over 2h after drug (E). No significant  
756 differences.

757

758

759 **Figure 3**

760

761 Aversive learning by auditory fear conditioning in GIT2-KO mice. GIT2 WT (n=9, black circle) and  
762 GIT2 KO (n=9, open circle) were subjected to auditory fear conditioning and tested for freezing  
763 behavior on day 1 (A), tested context-dependent freezing behavior on day 2 (B), and tested for cue  
764 (tone)-dependent freezing on day 3 by presenting the conditioning tone from min 2-5 (black bar)  
765 (C). \* $p < 0.05$ , WT versus KO mice using repeated measures ANOVA and post-hoc Sidak Multiple  
766 Comparison test.

767

768

769 **Figure 4**

770

771 Novel object recognition memory in GIT2 KO mice. A) Male GIT2 WT (n=6, black bars) and GIT2 KO  
772 (n=7, open bars) mice were trained using two identical objects, and then tested for short-term  
773 memory (STM) and long-term memory (LTM) using one novel object in place of one previously  
774 presented object. Male GIT2 WT and KO mice appeared indistinguishable during training and in  
775 showing preference for exploring the novel object at both test times, and had similar numbers of  
776 object contacts in all test periods. No significant differences between genotypes were detected at  
777 each test period using one-way ANOVA and Tukey's Multiple Comparison test. B) Female GIT2 WT  
778 (n=6, black bars) and GIT2 KO (n=6, open bars) mice appeared indistinguishable during training  
779 but differed in both short-term and long-term memory test. Wildtype female mice preferred the  
780 novel object, while female GIT2 KO mice preferred the familiar object; nevertheless, both genotypes  
781 had similar numbers of object contacts. \*  $p < 0.05$  for genotype using one-way ANOVA and Holm-  
782 Sidak post-hoc test.

783

784

785 **Figure 5**

786

787 Spatial learning and memory in GIT2 KO mice in the Morris water maze. A) Swim distance to hidden  
788 platform during acquisition learning (days 1-8) and reversal learning (days 9-16), GIT2 WT (n=10,  
789 black circles) and GIT2 KO (n=10, open circles). No significant difference between genotypes. B)  
790 Time spent swimming in each quadrant during a probe trials where the platform was absent,  
791 during alternate days following acquisition training (days 1-8). Mice exhibit increased time in the  
792 quadrant that had contained the platform (NE) and decreasing time in other quadrants across days.  
793 No significant differences between genotypes. C) Time spent swimming in each quadrant during a  
794 probe trials where the platform was absent, during alternate days following reversal training (days  
795 9-16). Mice exhibit increased time in the quadrant that had contained the platform (SW) and  
796 decreasing time in other quadrants across days. No significant differences between genotypes. D)  
797 Swim velocity during initial learning and reversal learning was significantly higher in GIT2-  
798 deficient mice over test days by repeated measures ANOVA, \*  $p=0.006$  for acquisition and \*  $p=0.003$   
799 for reversal learning. E) Visible platform test, swim distance during initial learning (days 1-5), WT  
800 (n=8, black circles) and KO (n=9, open circles). No significant difference between genotypes. F)  
801 Swim velocity during acquisition learning in the visible platform test over test days by repeated  
802 measures ANOVA, \*  $p=0.03$ .

803

804

805 **Figure 6**

806

807 Hippocampal CA1 synaptic spines are reduced in GIT2-deficient mice. A) Representative  
808 fluorescent micrographs of GFP-infected CA1 neurons showing spines. Scale bars are 2  $\mu\text{m}$ . B) Spine  
809 density was calculated by dividing the number of spines by the length ( $\mu\text{m}$ ) of the dendritic  
810 segment for each image counted, using 76 and 85 images from 5 WT mice and 5 GIT2-KO mice,  
811 respectively. \*  $p < 0.005$  using t-test. C) When counted, each individual spine was categorized as  
812 stubby, mushroom or thin based on length and width, and spine morphology distribution is  
813 presented as % of spines with each morphology type. Spine morphology distribution was not  
814 significantly altered by loss of GIT2.

815

816

#### 817 **Figure 7**

818

819 Hippocampal CA1 long-term potentiation is not altered by loss of GIT2. Hippocampal slices from  
820 WT and GIT2-KO mice (15 slices from 9 mice of each genotype) were stimulated at time 0 with 3  
821 episodes of theta burst stimulation (TBS) to induce LTP. Data are expressed as percent of average  
822 baseline EPSP slope response, and are presented as mean  $\pm$  SEM. No significant differences were  
823 observed.

824

825

#### 826 **Figure 8**

827

828  $\beta$ -PIX, GIT1 and PAK levels are unaltered in GIT2 KO mouse hippocampus, but  $\beta$ -PIX levels are  
829 reduced in GIT1 KO hippocampus. Western blot analysis was performed on hippocampal protein  
830 lysates from individual GIT2 WT (n=4), GIT2 KO (n=4), GIT1 WT (n=4) and GIT1 KO (n=4) mice

831 using GIT1 H-170,  $\beta$ -PIX p50,  $\alpha$ -PAK (PAK1) and  $\beta$ -PAK (PAK3) antibodies, respectively. Blots  
832 shown are representative of two experiments.

833

834

### 835 **Figure 9**

836

837 Brain GIT2 is predominantly a splice variant lacking two internal regions. A) Schematic diagram of  
838 GIT2 variants due to mRNA splicing, indicating the BC and E regions found to be missing in GIT2  
839 mRNA amplified from mouse hippocampus and amygdala. The locations of functional domains are  
840 indicated. B) Brain GIT2 unambiguously identified by immunoprecipitation of GIT1+GIT2 using a  
841 non-selective antibody from whole brain lysates from WT, GIT1 KO and GIT2 KO mice. Brain GIT1 is  
842 a single 95 kDa band that is absent in GIT1 KO, while the predominant brain GIT2 band is not at 95  
843 kDa as expected for full length GIT2 but is present at a smaller size (~87 kDa), and is absent in two  
844 distinct GIT2-KO strains. GIT2(XG510) is the GIT2 genetrapp-KO line characterized behaviorally  
845 here, while GIT2(Sabe) is the traditional NEO replacement knockout line described by the Sabe lab  
846 (Mazaki, Hashimoto et al. 2006). Blots shown are representative of two independent experiments.

847

848

### 849 **Figure 10**

850

851 GIT2( $\Delta$ BCE) fails to dimerize or to associate tightly with PIX proteins. A) The GIT2-long/Flag or  
852 GIT2( $\Delta$ BCE)/Flag constructs were transfected into HEK293 cells, and dimerization with  
853 endogenous GIT1 was assessed following Flag immunoprecipitation. While GIT1 is associated with  
854 GIT2-long, it does not co-immunoprecipitate with GIT2( $\Delta$ BCE). B) GIT2-long/Flag or  
855 GIT2( $\Delta$ BCE)/Flag were transfected into HEK293 cells, and association with endogenous  $\beta$ -PIX was

856 assessed following Flag immunoprecipitation. While  $\beta$ -PIX is associated with GIT2-long, it only  
857 weakly co-immunoprecipitates with GIT2( $\Delta$ BCE). Blots shown are representative of at least three  
858 independent experiments.

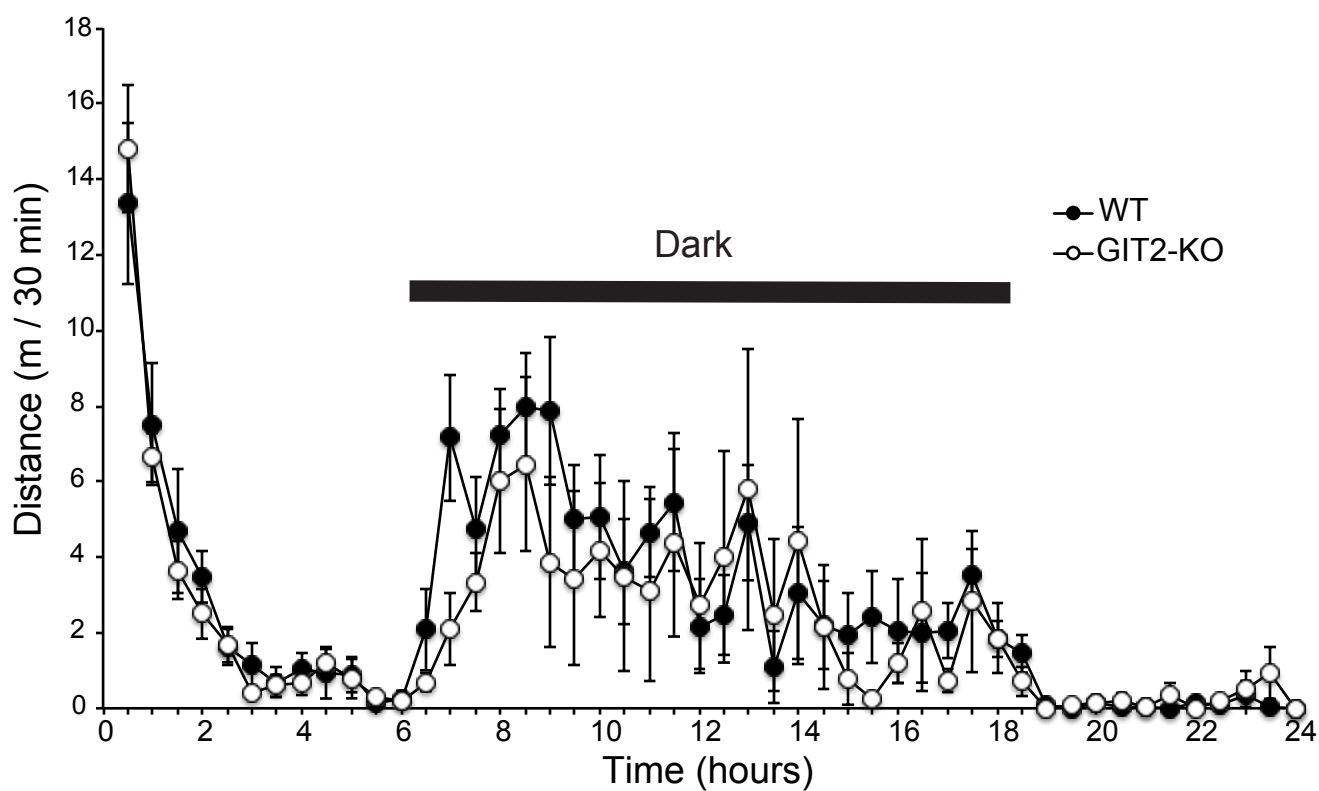

Figure 1, Toth et al



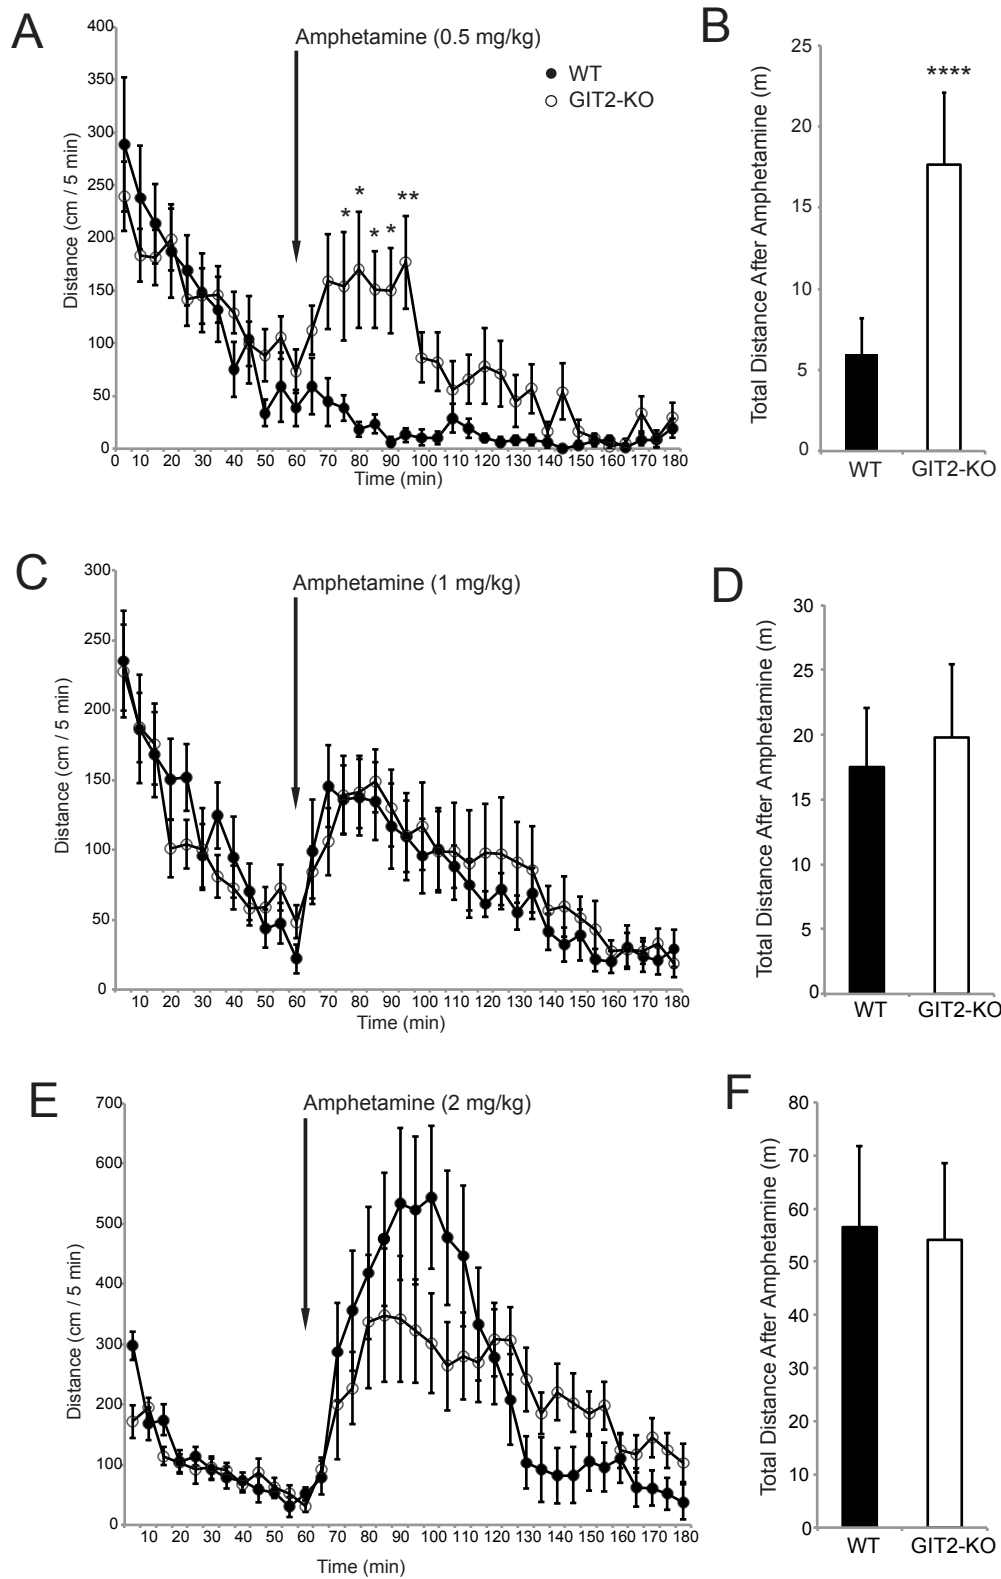

Figure 2 Toth et al

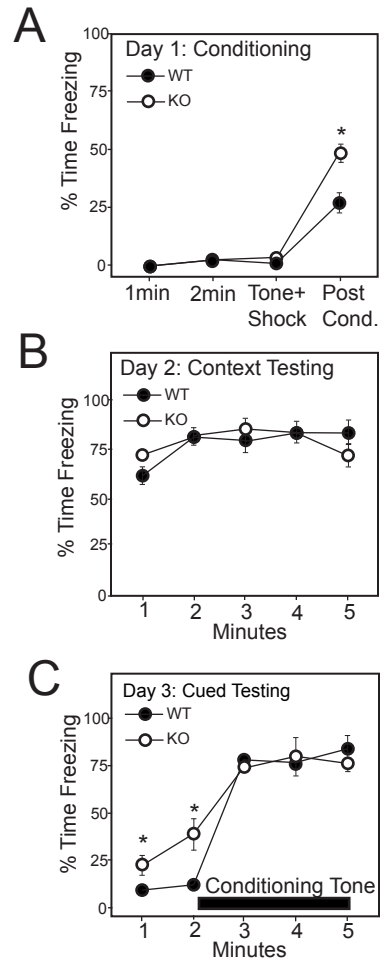

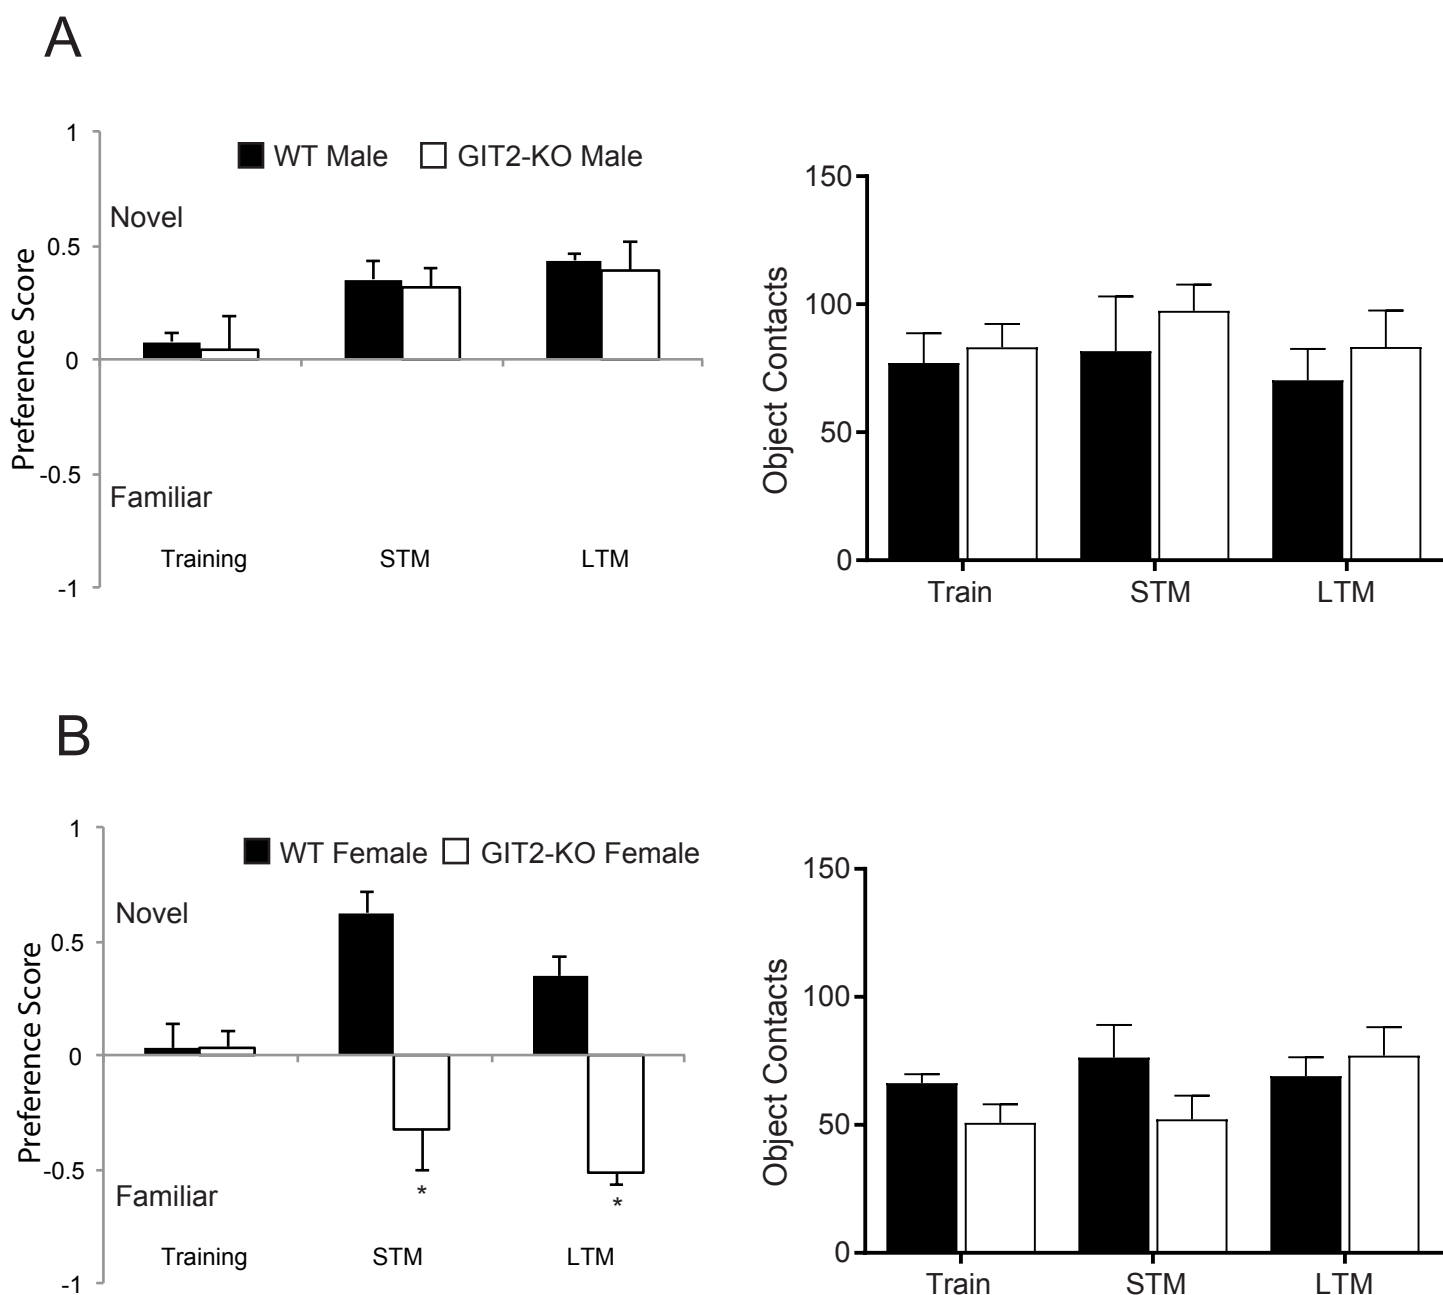

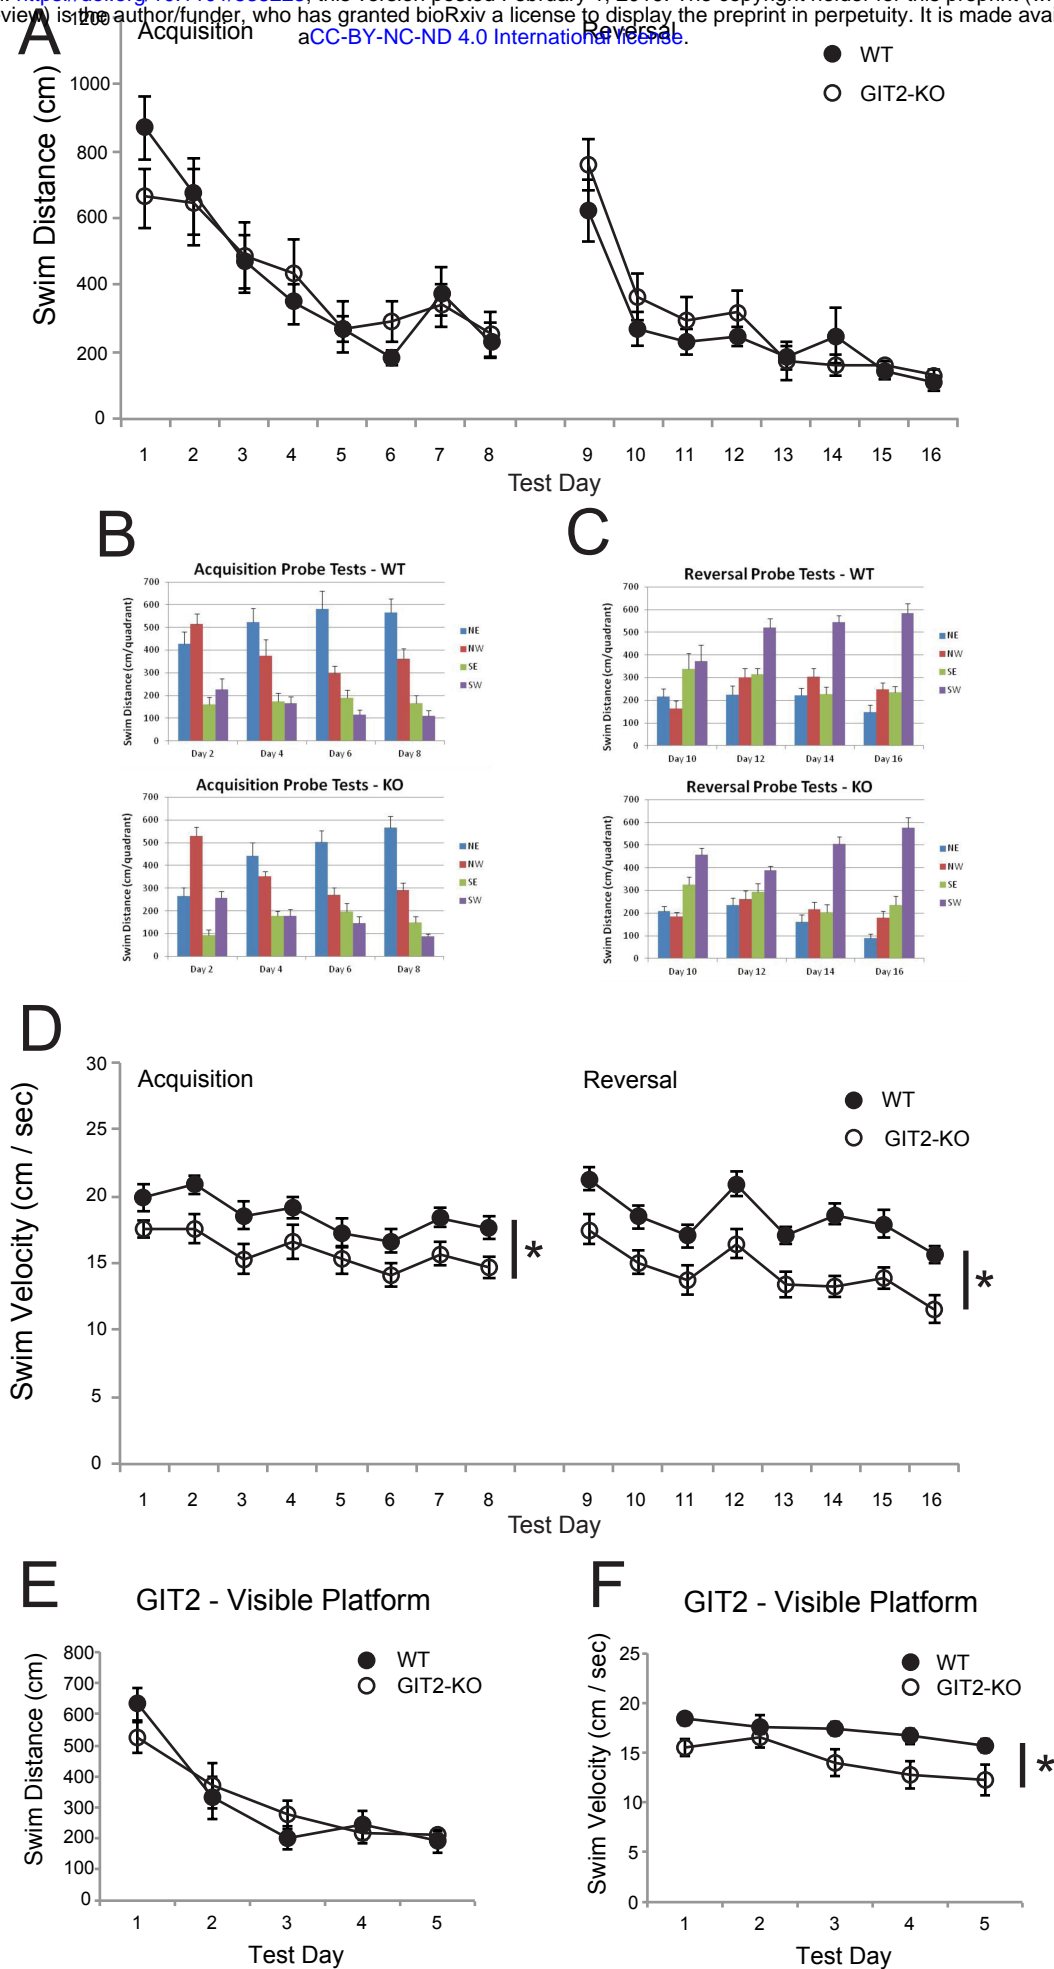

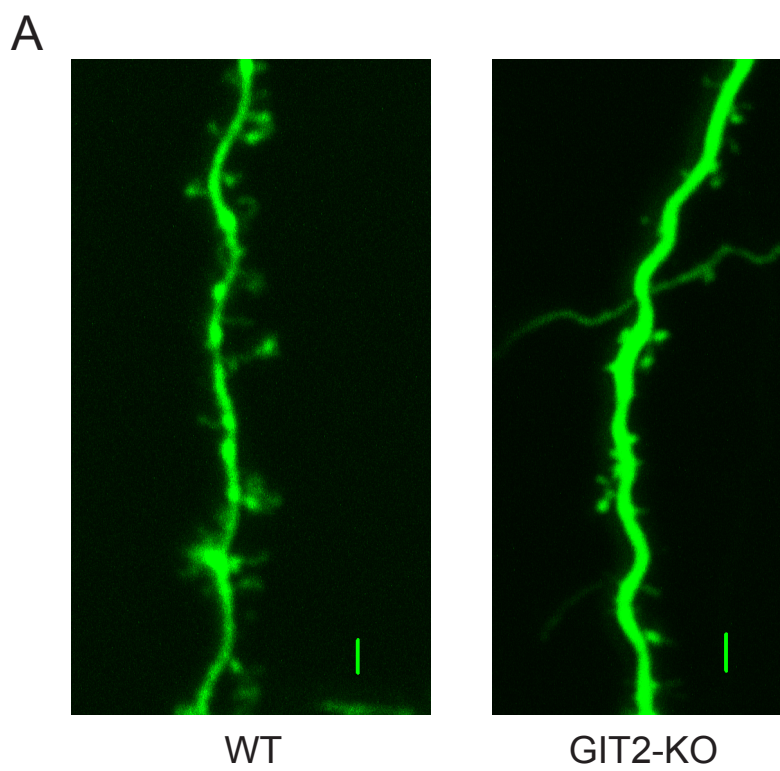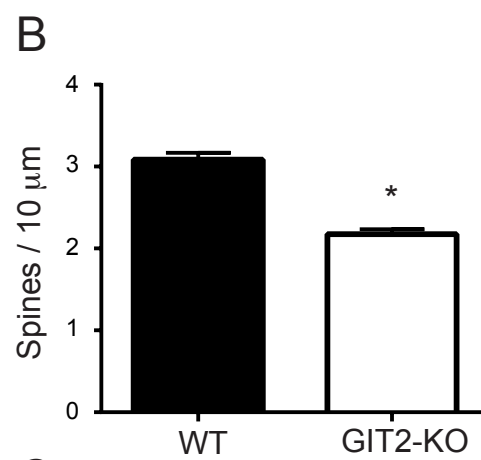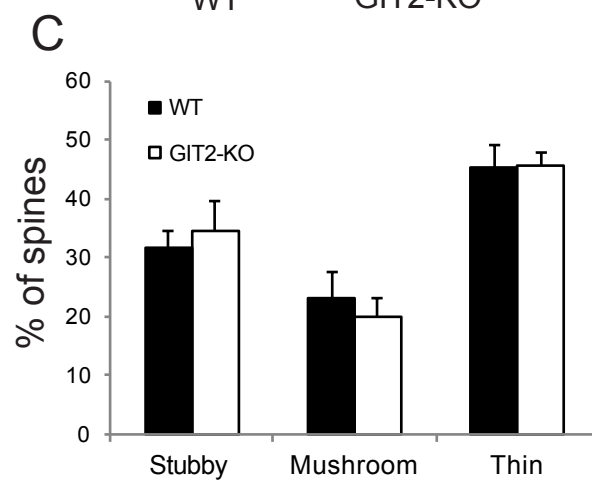

A

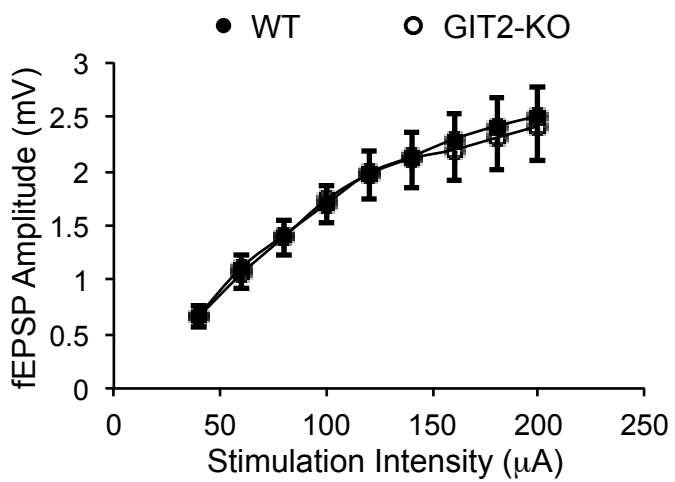

B

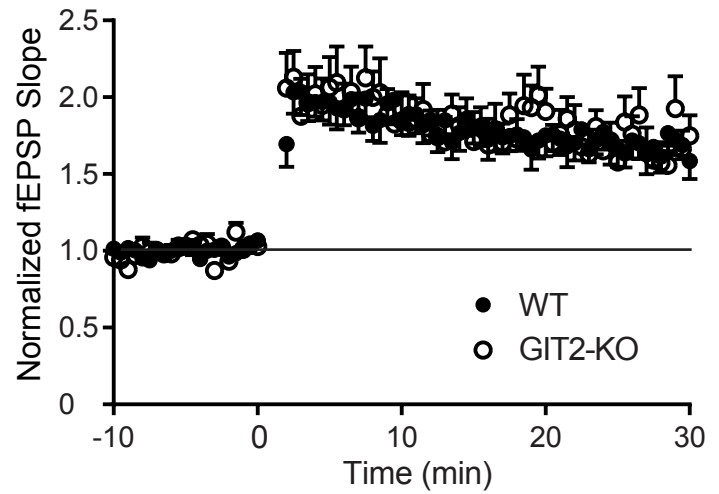

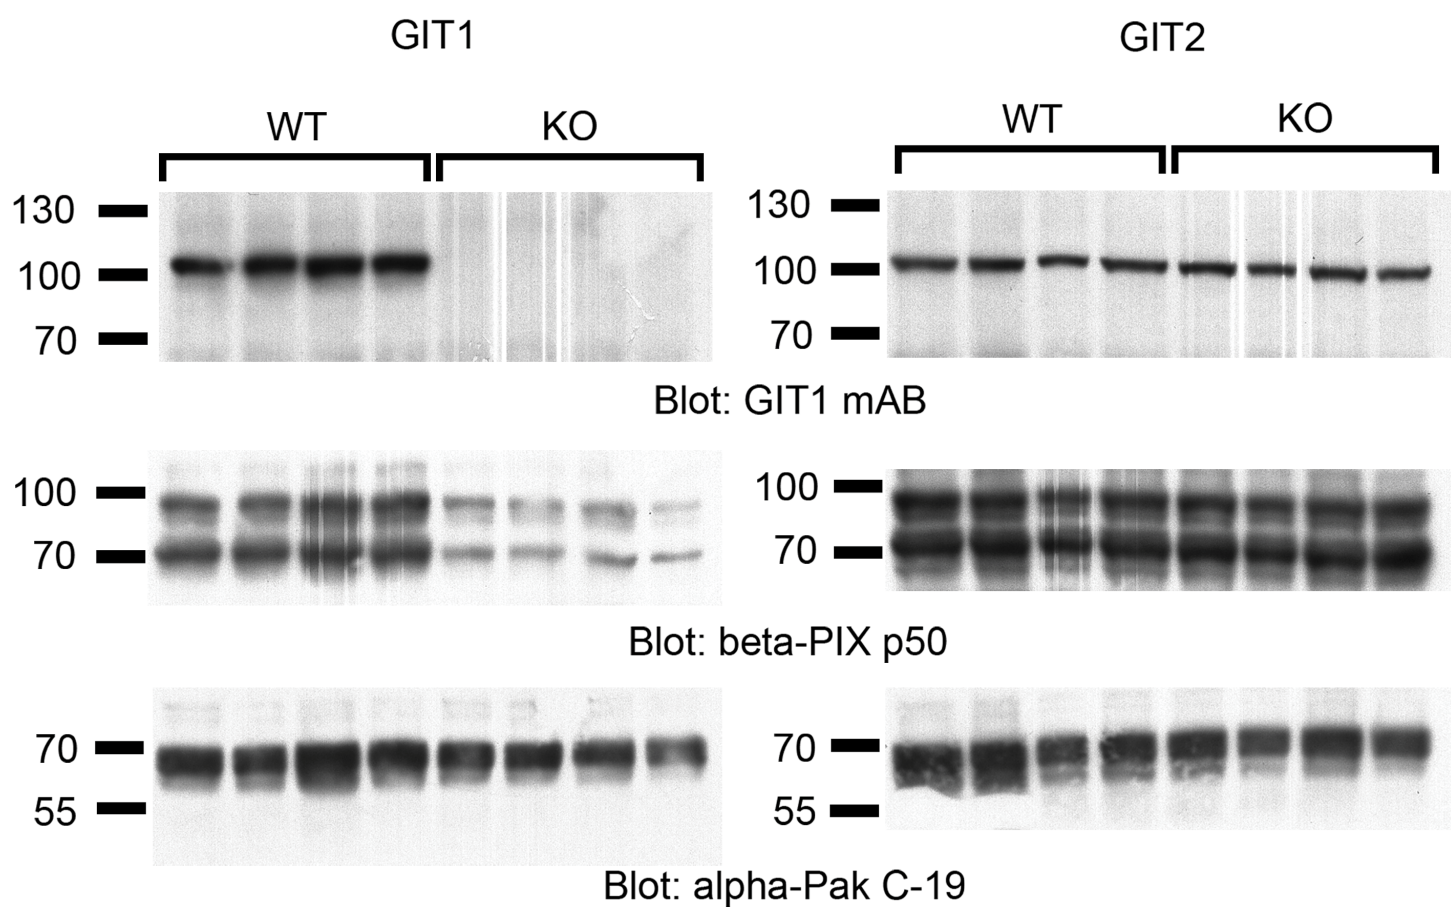

A

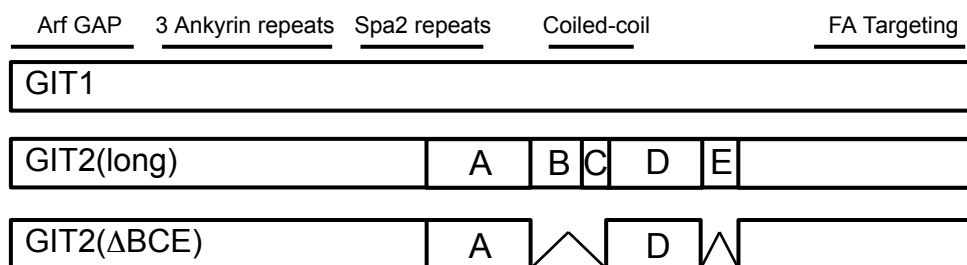

B

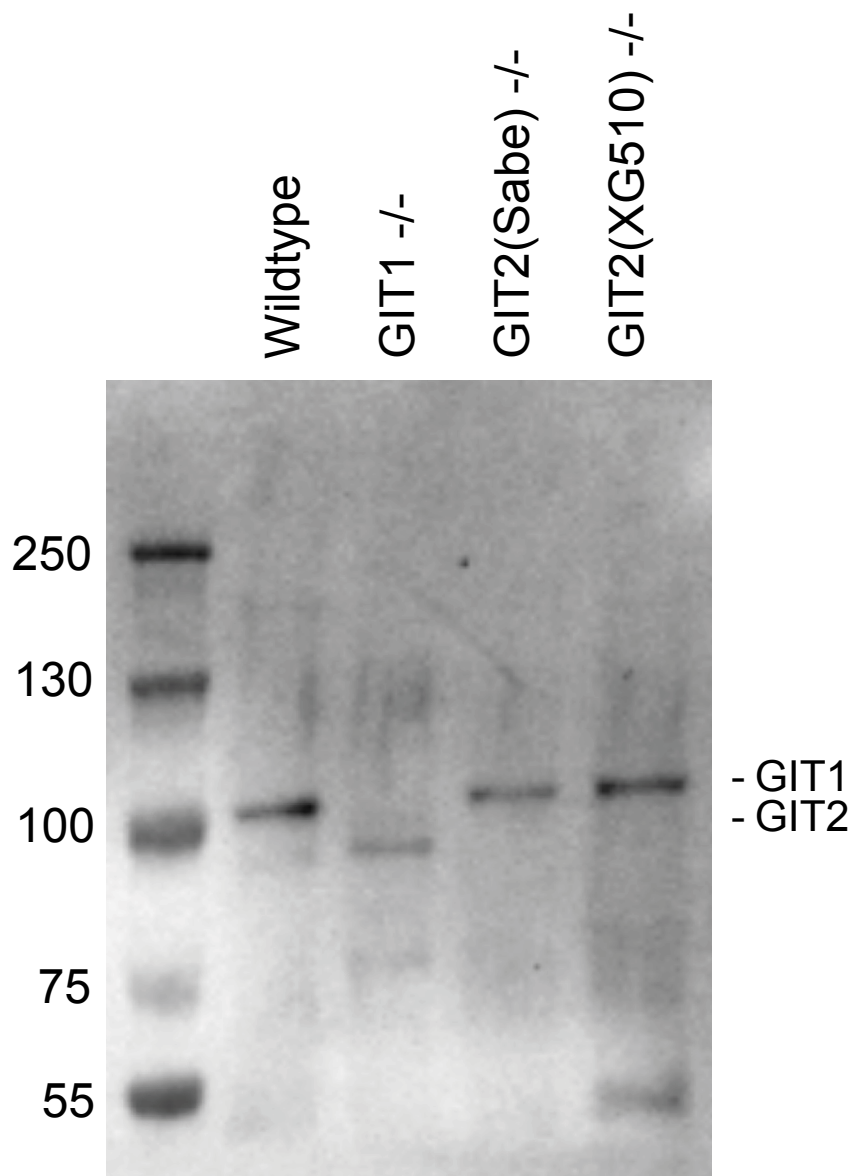

IP: PKL mAb (BD) [GIT2+GIT1]  
Blot: PKL mAb + TrueBlot 2°



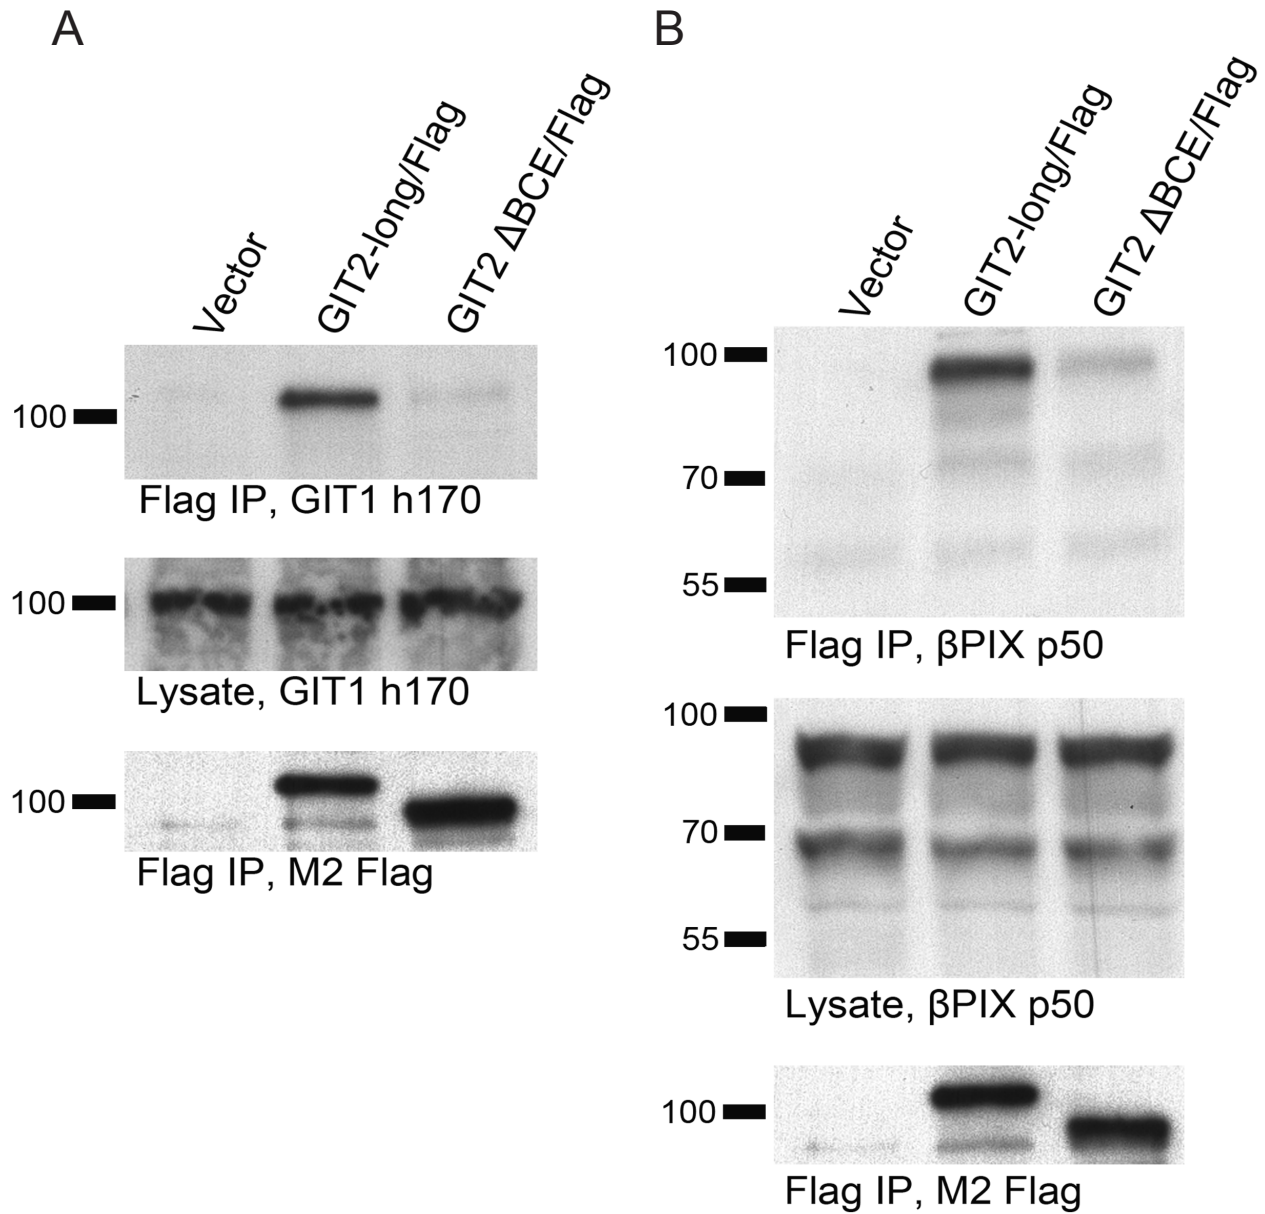

Source: https://biorxiv.org/content/biorxiv/early/2019/02/01/538223.full-text.pdf
